# Supplementary material for: A Simple Method of Synthesis of 3-Carboxy-2,2,5,5-Tetraethylpyrrolidine-1-oxyl and Preparation of Reduction-Resistant Spin Labels and Probes of Pyrrolidine Series
Source: MDPI journal article supplement (doi:10.3390/molecules26195761), 2021-09-23

# A simple method of synthesis of 3-carboxy-2,2,5,5-tetraethylpyrrolidine-1-oxyl and preparation of reduction-resistant spin labels and probes of pyrrolidine series

Sergey A. Dobrynin,<sup>1</sup> Mikhail S. Usatov,<sup>1,2</sup> Irina F. Zhurko,<sup>1</sup> Denis A. Morozov,<sup>1</sup> Yuliya F. Polienko,<sup>1</sup> Yuri I. Glazachev,<sup>3</sup> Dmitriy A. Parkhomenko,<sup>1</sup> Mikhail A. Tyumentsev,<sup>4</sup> Yuri V. Gatilov,<sup>1</sup> Elena I. Chernyak,<sup>1</sup> Elena G. Bagryanskaya,<sup>1</sup> Igor A. Kirilyuk<sup>1</sup>

<sup>1</sup>*N. N. Vorozhtsov Novosibirsk Institute of Organic Chemistry SB RAS, Lavrentiev Ave. 9, Novosibirsk, 630090, Russia; [dobrynin@nioch.nsc.ru](mailto:dobrynin@nioch.nsc.ru)*

<sup>2</sup>*Novosibirsk State University, Pirogova Str. 2, Novosibirsk, 630090, Russia*

<sup>3</sup>*Voevodsky Institute of Chemical Kinetics and Combustion SB RAS, Institutskaya 3, Novosibirsk, 630090, Russia*

<sup>4</sup>*Federal Research Center Institute of Cytology and Genetics SB RAS, Lavrentiev Ave. 10, Novosibirsk, 630090, Russia*

## Supporting Information

### Table of contents

|                                                                                                                                                                                         |    |
|-----------------------------------------------------------------------------------------------------------------------------------------------------------------------------------------|----|
| NMR spectra.....                                                                                                                                                                        | S4 |
| <sup>1</sup> H NMR (400 MHz; CD <sub>3</sub> OD/CDCl <sub>3</sub> , Zn/CF <sub>3</sub> COOH) of 3-carboxy-2,2,5,5-tetraethylpyrrolidine-1-oxyl (1). ....                                | S4 |
| <sup>1</sup> H NMR (400 MHz; CDCl <sub>3</sub> ) of 3-carboxy-2,2,5-triethyl-3,4-dihydro-2 <i>H</i> -pyrrole 1-oxide (8). .                                                             | S4 |
| <sup>13</sup> C{ <sup>1</sup> H} NMR (100 MHz; CDCl <sub>3</sub> ) of 3-carboxy-2,2,5-triethyl-3,4-dihydro-2 <i>H</i> -pyrrole 1-oxide (8). ....                                        | S5 |
| <sup>1</sup> H NMR (400 MHz; CD <sub>3</sub> OD/CDCl <sub>3</sub> , Zn/CF <sub>3</sub> COOH) of 3-carboxy-5-ethynyl-2,2,5-triethylpyrrolidine-1-oxyl – mixture of isomers (10a,b). .... | S5 |
| <sup>1</sup> H NMR(400 MHz; CD <sub>3</sub> OD/CDCl <sub>3</sub> , Zn/CF <sub>3</sub> COOH) of 3-carboxy-5-ethynyl-2,2,5-triethylpyrrolidine-1-oxyl –major isomer (10a). ....           | S6 |
| <sup>1</sup> H NMR(400 MHz; CD <sub>3</sub> OD/CDCl <sub>3</sub> , Zn/CF <sub>3</sub> COOH) of 3-carboxy-5-vinyl-2,2,5-triethylpyrrolidine-1-oxyl (14). ....                            | S6 |
| <sup>1</sup> H NMR (400 MHz; CD <sub>3</sub> OD/CDCl <sub>3</sub> ) of 3-carboxy-2,2,5,5-tetraethylpyrrolidine (15).....                                                                | S7 |
| <sup>13</sup> C{ <sup>1</sup> H} NMR (100 MHz; CD <sub>3</sub> OD/CDCl <sub>3</sub> ) of 3-carboxy-2,2,5,5-tetraethylpyrrolidine (15). ....                                             | S7 |
| <sup>1</sup> H NMR (100 MHz;CDCl <sub>3</sub> ) of 1-hydroxy-3-methoxycarbonyl-2,2,5,5-tetraethylpyrrolidine hydrochloride (17a,b) .....                                                | S8 |
| <sup>13</sup> C{ <sup>1</sup> H} NMR (75 MHz; CDCl <sub>3</sub> ) of 1-Hydroxy-3-methoxycarbonyl-2,2,5,5-tetraethylpyrrolidine hydrochloride (17a,b) .....                              | S9 |

|                                                                                                                                                                                                                                                   |     |
|---------------------------------------------------------------------------------------------------------------------------------------------------------------------------------------------------------------------------------------------------|-----|
| <sup>1</sup> H NMR (300 MHz; CD <sub>3</sub> OD/CDCl <sub>3</sub> , Zn/CF <sub>3</sub> COOH) of 3-hydroxymethyl -2,2,5,5-tetraethylpyrrolidine-1-oxyl (18).....                                                                                   | S9  |
| <sup>1</sup> H NMR (500 MHz; CD <sub>3</sub> OD/CDCl <sub>3</sub> , Zn/CF <sub>3</sub> COOH) of 3-hydroxymethyl-5-ethynyl-2,2,5-triethylpyrrolidine-1-oxyl mixture of isomers (19a,b). ....                                                       | S10 |
| <sup>1</sup> H NMR (300 MHz; CD <sub>3</sub> OD/CDCl <sub>3</sub> , Zn/CF <sub>3</sub> COOH) of 3-methansulfonyloxy-methyl-2,2,5,5-tetraethylpyrrolidine-1-oxyl (20).....                                                                         | S11 |
| <sup>1</sup> H NMR (300 MHz; CD <sub>3</sub> OD/CDCl <sub>3</sub> , Zn/CF <sub>3</sub> COOH) of 3-aminomethyl -2,2,5,5-tetraethylpyrrolidine-1-oxyl (22).....                                                                                     | S11 |
| <sup>1</sup> H NMR (300 MHz; CD <sub>3</sub> OD/CDCl <sub>3</sub> , Zn/CF <sub>3</sub> COOH) of 3-(2-triphenylphosphonioacetamido)methyl-2,2,5,5-tetraethylpyrrolidine-1-oxyl chloride (28). ....                                                 | S12 |
| <sup>1</sup> H NMR (300 MHz; CD <sub>3</sub> OD/CDCl <sub>3</sub> , Zn/CF <sub>3</sub> COOH) of 3-(2-(pyrrolidin-1-yl)acetamidomethyl)-2,2,5,5-tetraethylpyrrolidine-1-oxyl (29).....                                                             | S12 |
| <sup>1</sup> H NMR (300 MHz; CD <sub>3</sub> OD/CDCl <sub>3</sub> , Zn/CF <sub>3</sub> COOH) of 3-((piperidin-1-yl)methyl)-2,2,5,5-tetraethylpyrrolidine-1-oxyl (30).....                                                                         | S13 |
| <sup>1</sup> H NMR (300 MHz; CD <sub>3</sub> OD/CDCl <sub>3</sub> , Zn/CF <sub>3</sub> COOH) of 3-(dimethylaminomethyl)-2,2,5,5-tetraethylpyrrolidine-1-oxyl (31).....                                                                            | S13 |
| Line shape analysis of multiplets for mixture of isomers 10a,b. ....                                                                                                                                                                              | S14 |
| Fig. S1 Simulation of spin system for <sup>1</sup> H NMR (400 MHz; CD <sub>3</sub> OD/CDCl <sub>3</sub> , Zn/CF <sub>3</sub> COOH system) of 3-carboxy-5-ethynyl-2,2,5-triethylpyrrolidine-1-oxyl – mixture of isomers (10a,b). ....              | S14 |
| Table S1. Simulation of spin system parameters for <sup>1</sup> H NMR (400 MHz; CD <sub>3</sub> OD/CDCl <sub>3</sub> , Zn/CF <sub>3</sub> COOH system) of 3-carboxy-5-ethynyl-2,2,5-triethylpyrrolidine-1-oxyl – mixture of isomers (10a,b). .... | S14 |
| IR spectra.....                                                                                                                                                                                                                                   | S15 |
| IR (KBr) of 3-carboxy-2,2,5,5-tetraethylpyrrolidine-1-oxyl (1). ....                                                                                                                                                                              | S15 |
| IR (neat) of 3-[[2,5-dioxo-1-pyrrolidinyl]oxy]carbonyl]-2,2,5,5-tetraethylpyrrolidine-1-oxyl (3). ....                                                                                                                                            | S15 |
| IR (KBr) of 3-carboxy-2,2,5-triethyl-3,4-dihydro-2H-pyrrole 1-oxide (8).....                                                                                                                                                                      | S15 |
| IR (KBr) of 3-carboxy-5-ethynyl-2,2,5-triethylpyrrolidine-1-oxyl (10a,b). ....                                                                                                                                                                    | S16 |
| IR (KBr) of 3-carboxy-5-vinyl-2,2,5-triethylpyrrolidine-1-oxyl (14).....                                                                                                                                                                          | S16 |
| IR (KBr) of 3-carboxy-2,2,5,5-tetraethylpyrrolidine (15). ....                                                                                                                                                                                    | S16 |
| IR (neat) of 3-methoxycarbonyl-2,2,5,5-tetraethylpyrrolidine-1-oxyl (16). ....                                                                                                                                                                    | S17 |
| IR (KBr) of 1-hydroxy-3-methoxycarbonyl-2,2,5,5-tetraethylpyrrolidine hydrochloride (17) .                                                                                                                                                        | S17 |
| IR (neat) of 3-hydroxymethyl-2,2,5,5-tetraethylpyrrolidine-1-oxyl (18).....                                                                                                                                                                       | S17 |
| IR (neat) of 3-hydroxymethyl-5-ethynyl-2,2,5-triethylpyrrolidine-1-oxyl (19a,b).....                                                                                                                                                              | S18 |
| IR (neat) of 3-bromomethyl-2,2,5,5-tetraethylpyrrolidine-1-oxyl (20a).....                                                                                                                                                                        | S18 |
| IR (neat) of 3-mesyloxymethyl-2,2,5,5-tetraethylpyrrolidine-1-oxyl (20b).....                                                                                                                                                                     | S18 |
| IR (neat) of 3-azidomethyl-2,2,5,5-tetraethylpyrrolidine-1-oxyl (21). ....                                                                                                                                                                        | S19 |
| IR (neat) of 3-aminomethyl-2,2,5,5-tetraethylpyrrolidine-1-oxyl (22). ....                                                                                                                                                                        | S19 |
| IR (KBr) of 3-maleimidomethyl-2,2,5,5-tetraethylpyrrolidine-1-oxyl (24).....                                                                                                                                                                      | S19 |

|                                                                                                                     |     |
|---------------------------------------------------------------------------------------------------------------------|-----|
| IR (neat) of 3-bromoacetamidomethyl-2,2,5,5-tetraethylpyrrolidine-1-oxyl (25). .....                                | S20 |
| IR (neat) of 3-Chloroacetamidomethyl-2,2,5,5-tetraethylpyrrolidine-1-oxyl (26).....                                 | S20 |
| IR (KBr) of 3-Iodoacetamidomethyl-2,2,5,5-tetraethylpyrrolidine-1-oxyl (27). .....                                  | S20 |
| IR (KBr) of 3-(2-triphenylphosphonio-acetamido)methyl-2,2,5,5-tetraethylpyrrolidine-1-oxyl<br>chloride (28). .....  | S21 |
| IR (neat) of 3-(2-(pyrrolidin-1yl)acetamidomethyl)-2,2,5,5-tetraethylpyrrolidine-1-oxyl (29).                       | S21 |
| IR (neat) of 3-((piperidin-1-yl)methyl)-2,2,5,5-tetraethylpyrrolidine-1-oxyl (30).....                              | S21 |
| IR (neat) of 3-(dimethylaminomethyl)-2,2,5,5-tetraethylpyrrolidine-1-oxyl (31). .....                               | S22 |
| HPLC analyses .....                                                                                                 | S23 |
| HPLC of 3-carboxy-5-ethynyl-2,2,5-triethylpyrrolidine-1-oxyl major isomer(19a). .....                               | S23 |
| HPLC of 3-((piperidin-1-yl)methyl)-2,2,5,5-tetraethylpyrrolidine-1-oxyl (30).....                                   | S24 |
| HPLC of 3-(2-(pyrrolidin-1yl)acetamidomethyl)-2,2,5,5-tetraethylpyrrolidine-1-oxyl (29).....                        | S25 |
| Table S2. X-ray experimental details .....                                                                          | S26 |
| Fig.S2. X-Ray of 3-carboxy-5-ethynyl-2,2,5-triethylpyrrolidine-1-oxyl (10a).....                                    | S27 |
| Fig. S3. The dependences of the first order rates of radical reductions versus ascorbic acid<br>concentrations..... | S28 |

## NMR spectra

**<sup>1</sup>H NMR (400 MHz; CD<sub>3</sub>OD/CDCl<sub>3</sub>, Zn/CF<sub>3</sub>COOH) of 3-carboxy-2,2,5,5-tetraethylpyrrolidine-1-oxyl (1).**

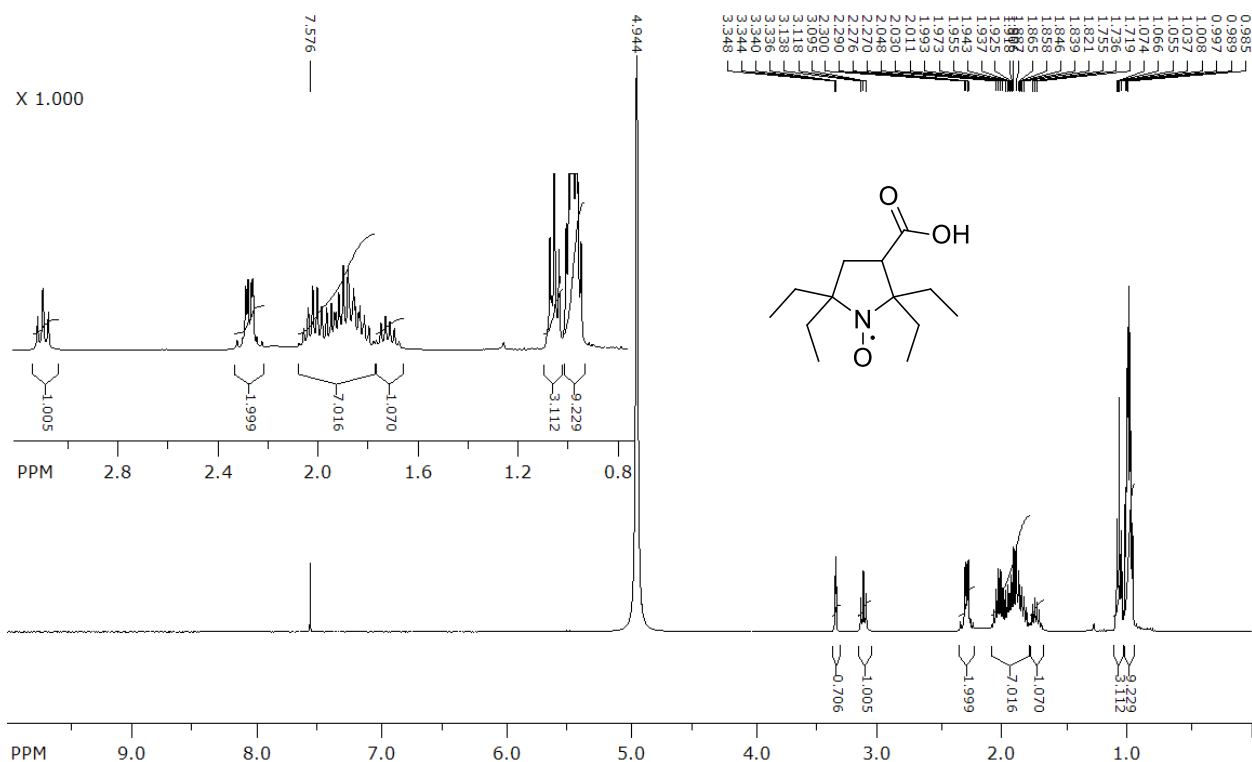

**<sup>1</sup>H NMR (400 MHz; CDCl<sub>3</sub>) of 3-carboxy-2,2,5-triethyl-3,4-dihydro-2H-pyrrole 1-oxide (8).**

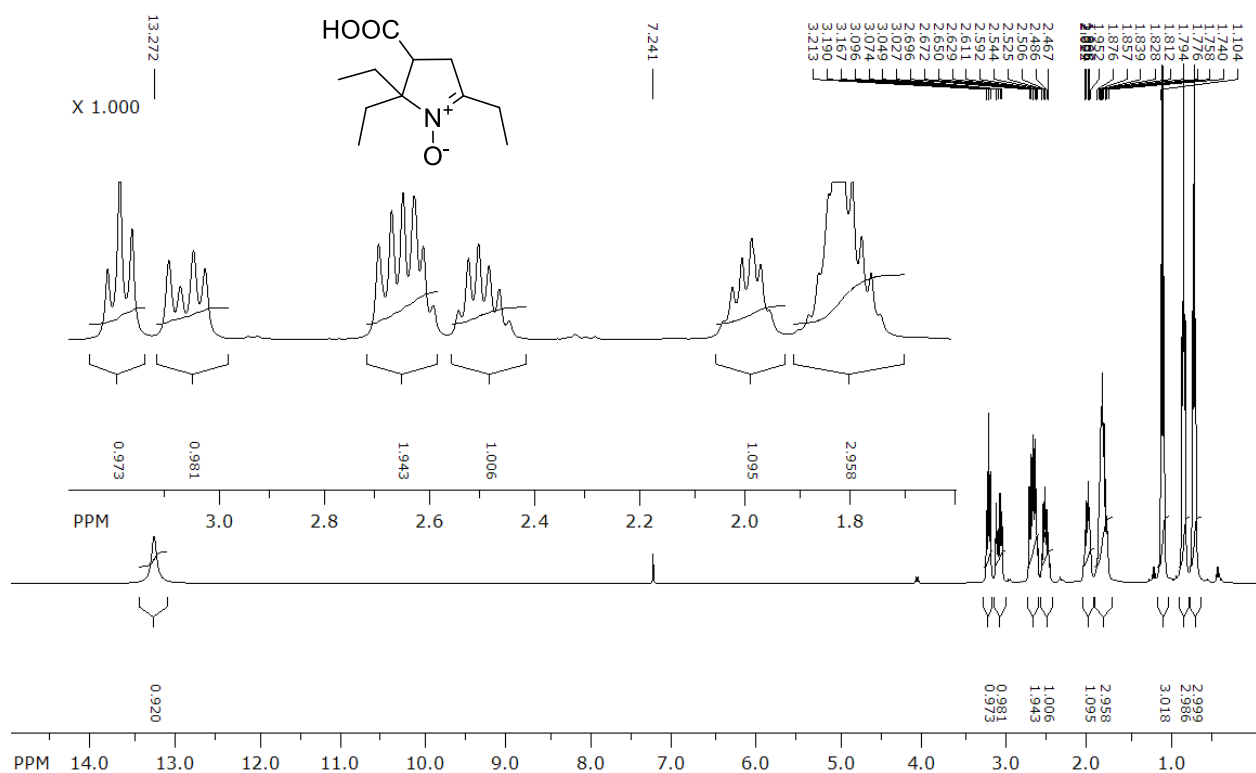

**$^{13}\text{C}\{^1\text{H}\}$  NMR (100 MHz;  $\text{CDCl}_3$ ) of 3-carboxy-2,2,5-triethyl-3,4-dihydro-2H-pyrrole 1-oxide (8).**

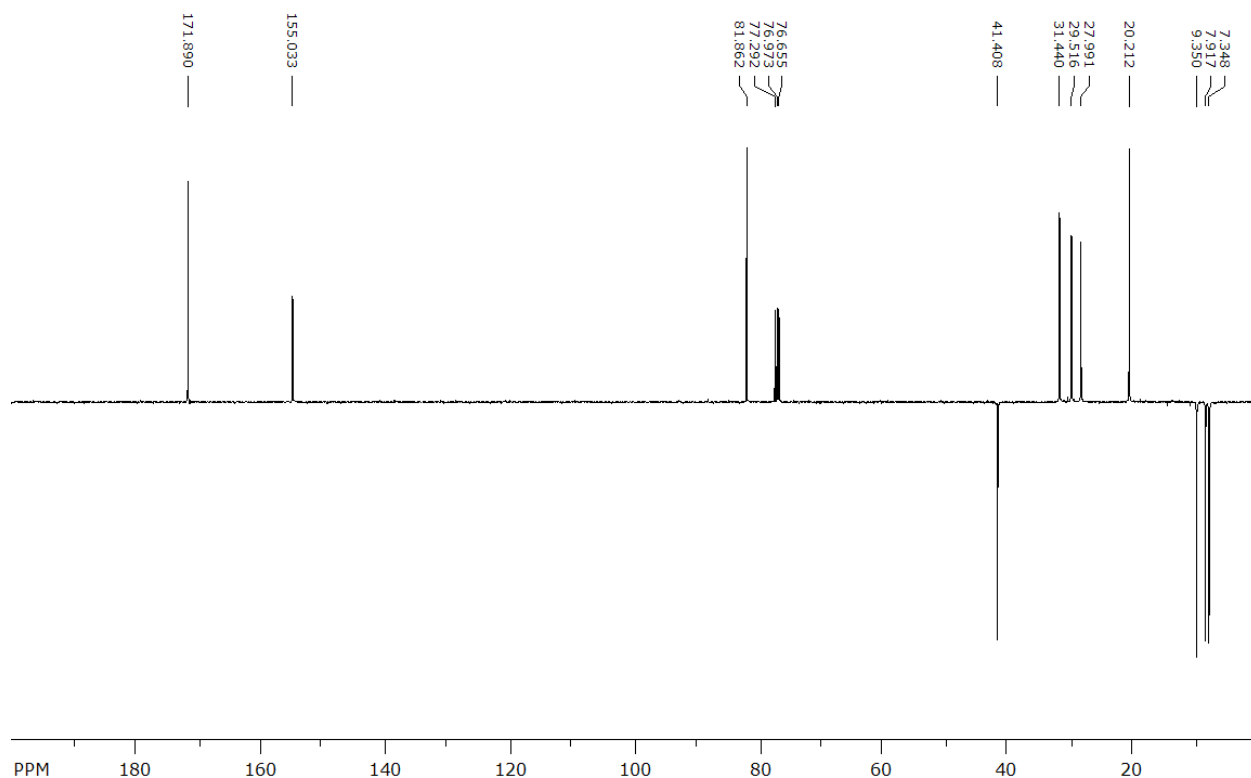

**$^1\text{H}$  NMR (400 MHz;  $\text{CD}_3\text{OD}/\text{CDCl}_3$ ,  $\text{Zn}/\text{CF}_3\text{COOH}$ ) of 3-carboxy-5-ethynyl-2,2,5-triethylpyrrolidine-1-oxyl – mixture of isomers (10a,b).**

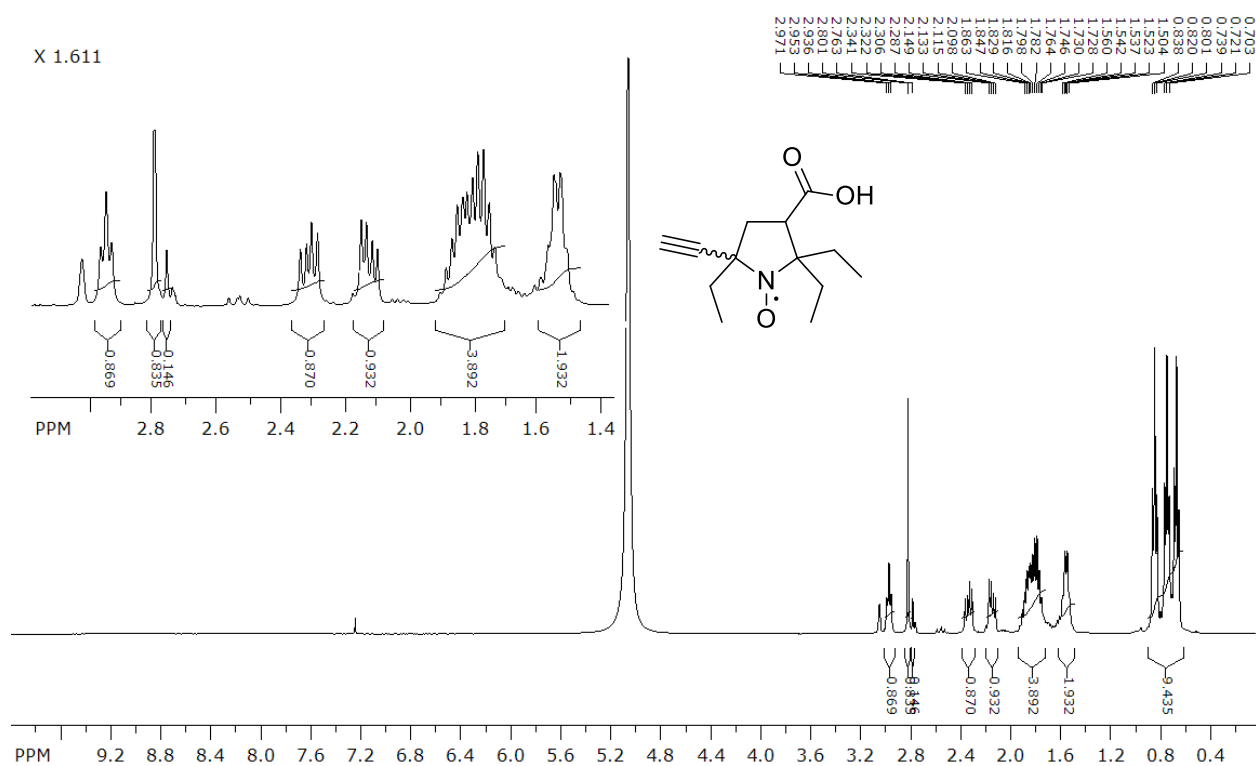

**$^1\text{H}$  NMR(400 MHz;  $\text{CD}_3\text{OD}/\text{CDCl}_3$ ,  $\text{Zn}/\text{CF}_3\text{COOH}$ ) of 3-carboxy-5-ethynyl-2,2,5-triethylpyrrolidine-1-oxyl –major isomer (10a).**

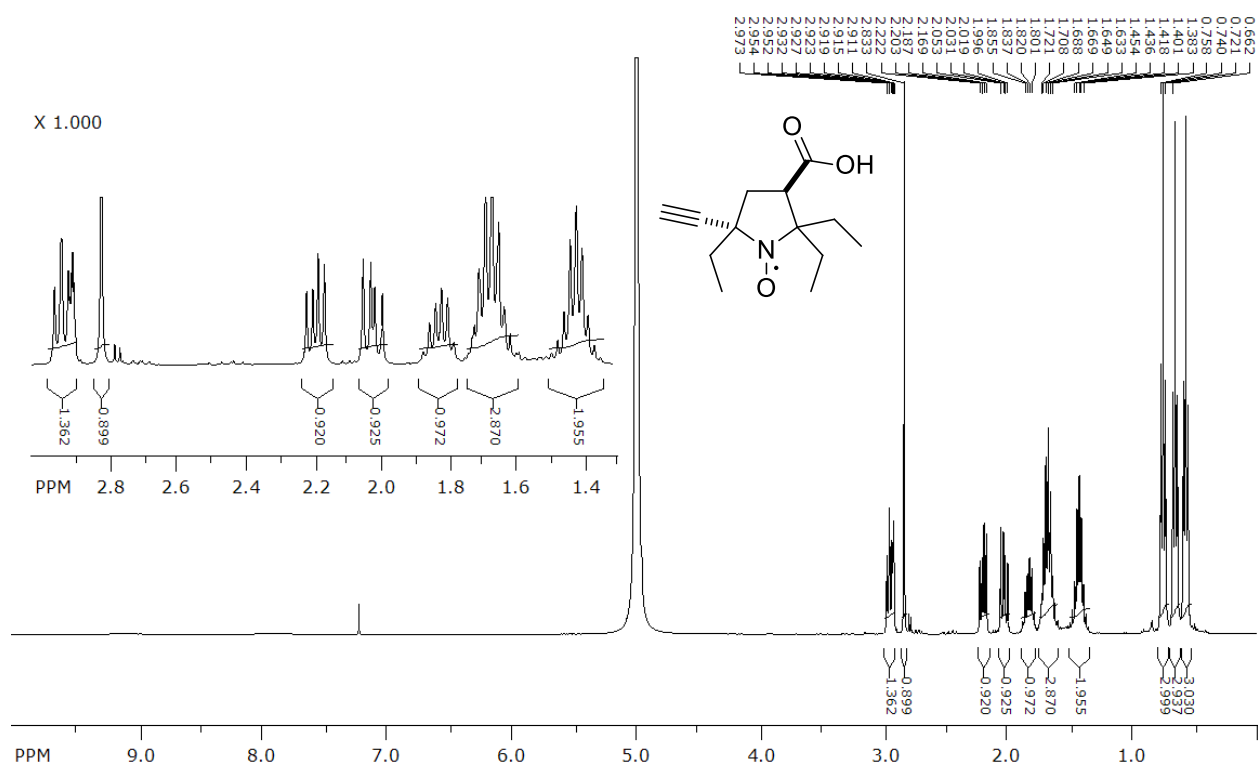

**$^1\text{H}$  NMR(400 MHz;  $\text{CD}_3\text{OD}/\text{CDCl}_3$ ,  $\text{Zn}/\text{CF}_3\text{COOH}$ ) of 3-carboxy-5-vinyl-2,2,5-triethylpyrrolidine-1-oxyl (14).**

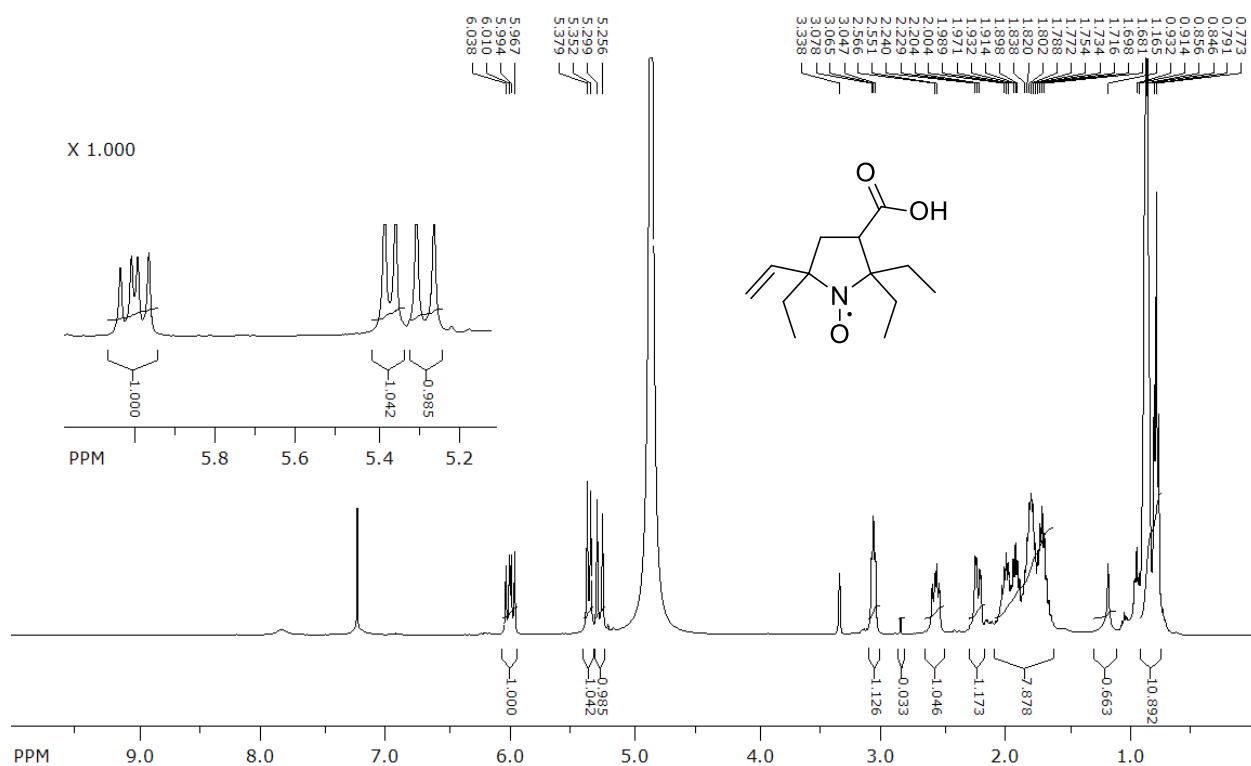

**$^1\text{H}$  NMR (400 MHz;  $\text{CD}_3\text{OD}/\text{CDCl}_3$ ) of 3-carboxy-2,2,5,5-tetraethylpyrrolidine (15).**

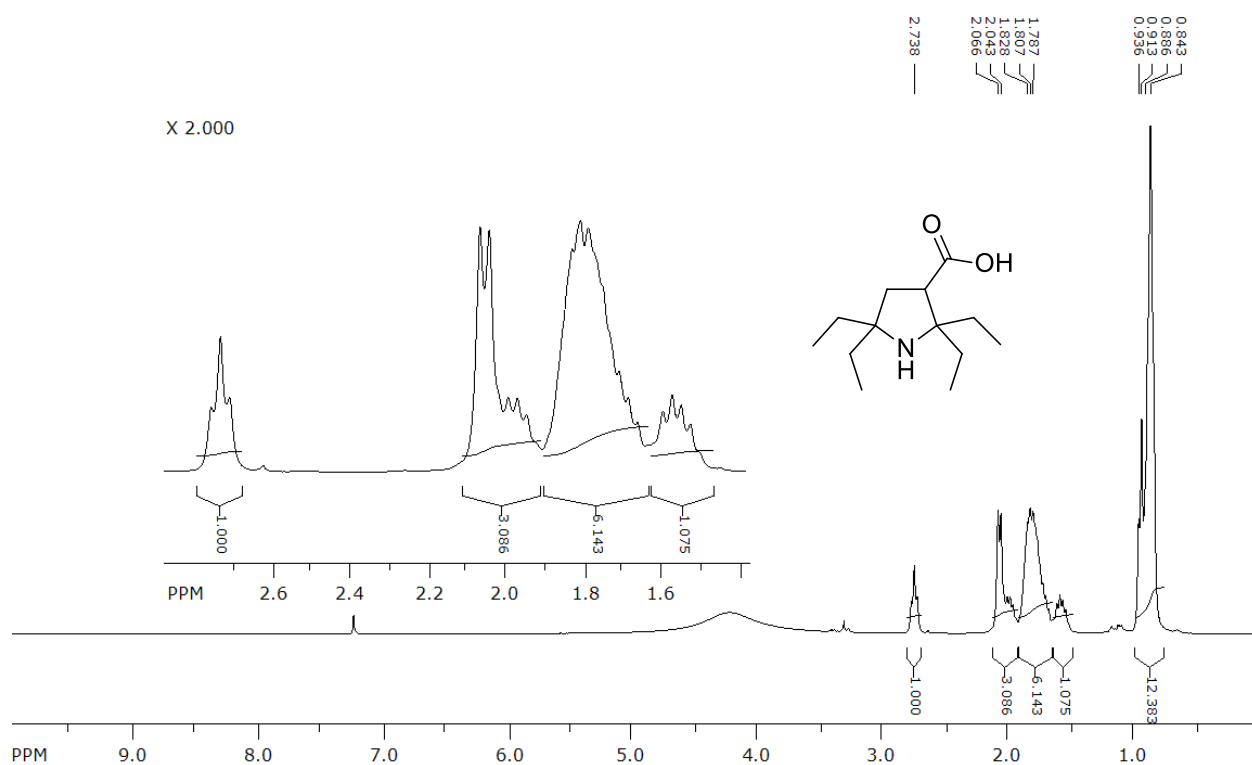

**$^{13}\text{C}\{^1\text{H}\}$  NMR (100 MHz;  $\text{CD}_3\text{OD}/\text{CDCl}_3$ ) of 3-carboxy-2,2,5,5-tetraethylpyrrolidine (15).**

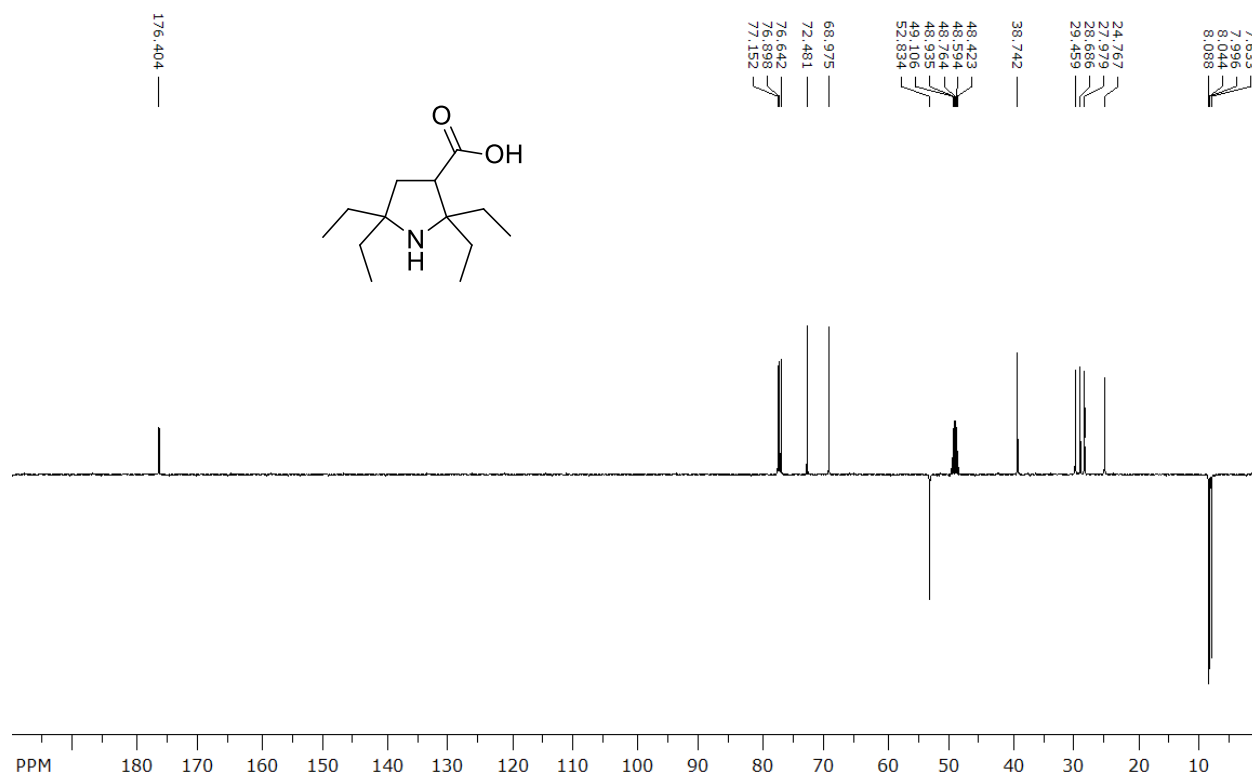

**<sup>1</sup>H NMR (100 MHz;CDCl<sub>3</sub>) of 1-hydroxy-3-methoxycarbonyl-2,2,5,5-tetraethylpyrrolidine hydrochloride (17a,b)**

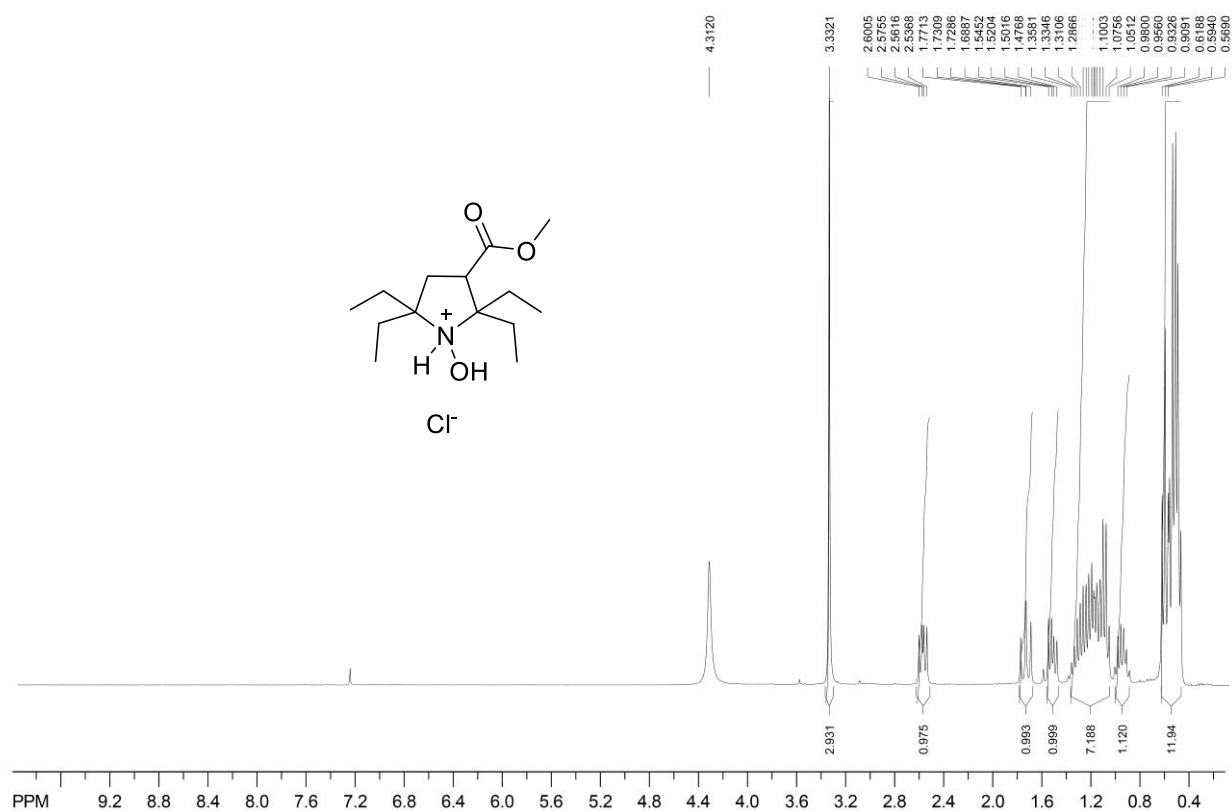

**$^{13}\text{C}\{^1\text{H}\}$  NMR (75 MHz;  $\text{CDCl}_3$ ) of 1-Hydroxy-3-methoxycarbonyl-2,2,5,5-tetraethylpyrrolidine hydrochloride (17a,b)**

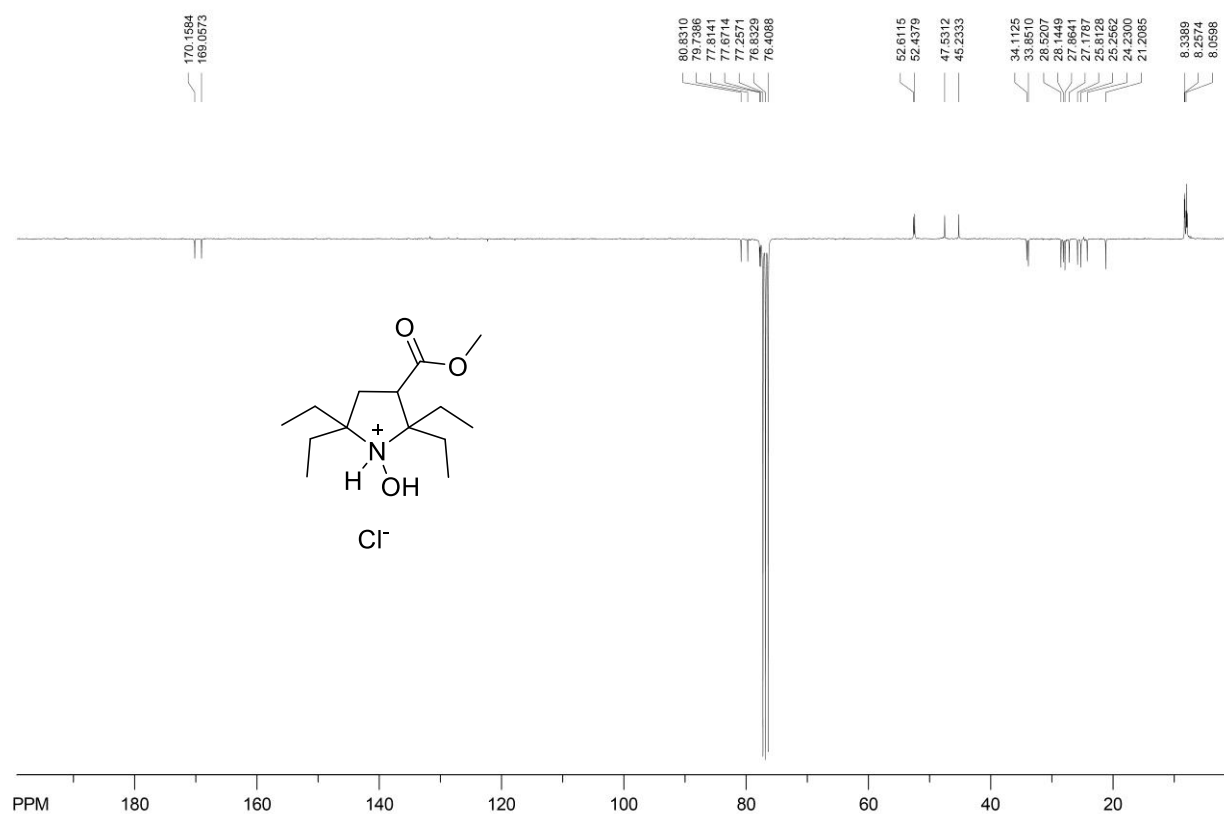

**$^1\text{H}$  NMR (300 MHz;  $\text{CD}_3\text{OD}/\text{CDCl}_3$ ,  $\text{Zn}/\text{CF}_3\text{COOH}$ ) of 3-hydroxymethyl-2,2,5,5-tetraethylpyrrolidine-1-oxyl (18).**

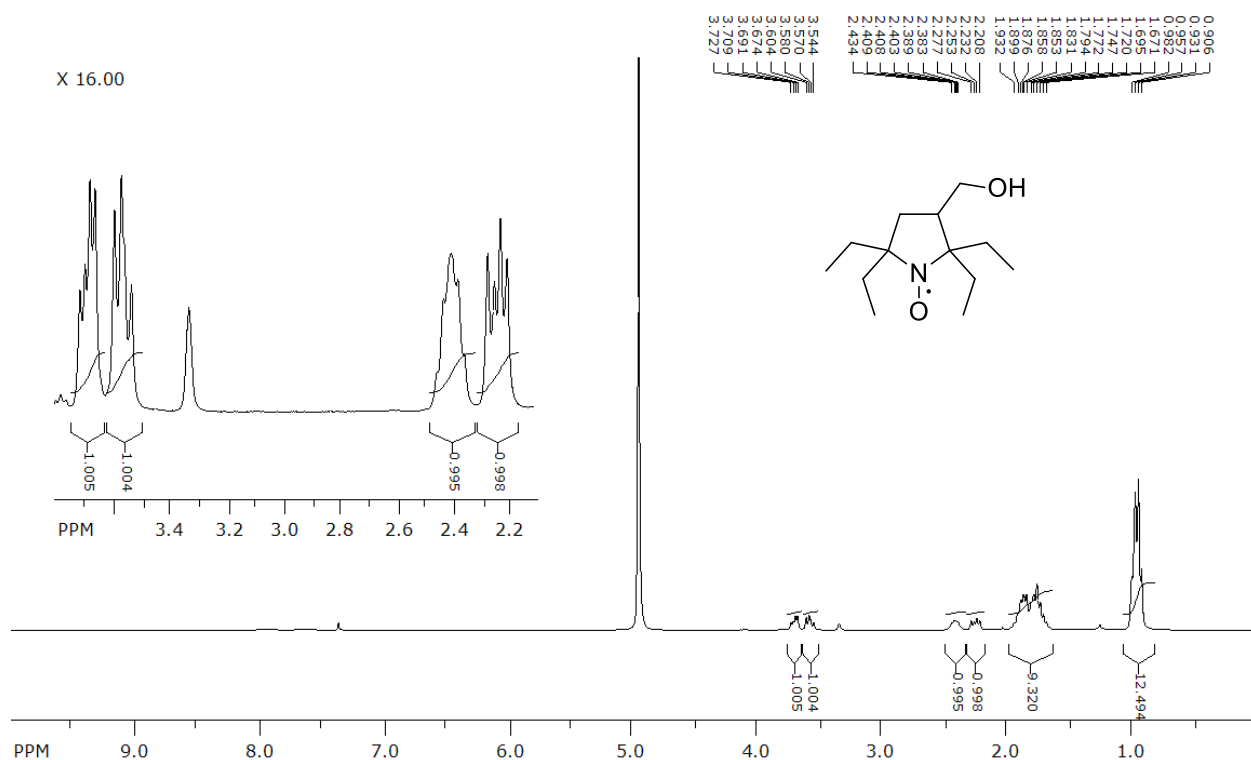

**$^1\text{H}$  NMR (500 MHz;  $\text{CD}_3\text{OD}/\text{CDCl}_3$ ,  $\text{Zn}/\text{CF}_3\text{COOH}$ ) of 3-hydroxymethyl-5-ethynyl-2,2,5-triethylpyrrolidine-1-oxyl mixture of isomers (19a,b).**

$\text{CD}_3\text{OD}$ ;  $\text{CF}_3\text{COO}^-$

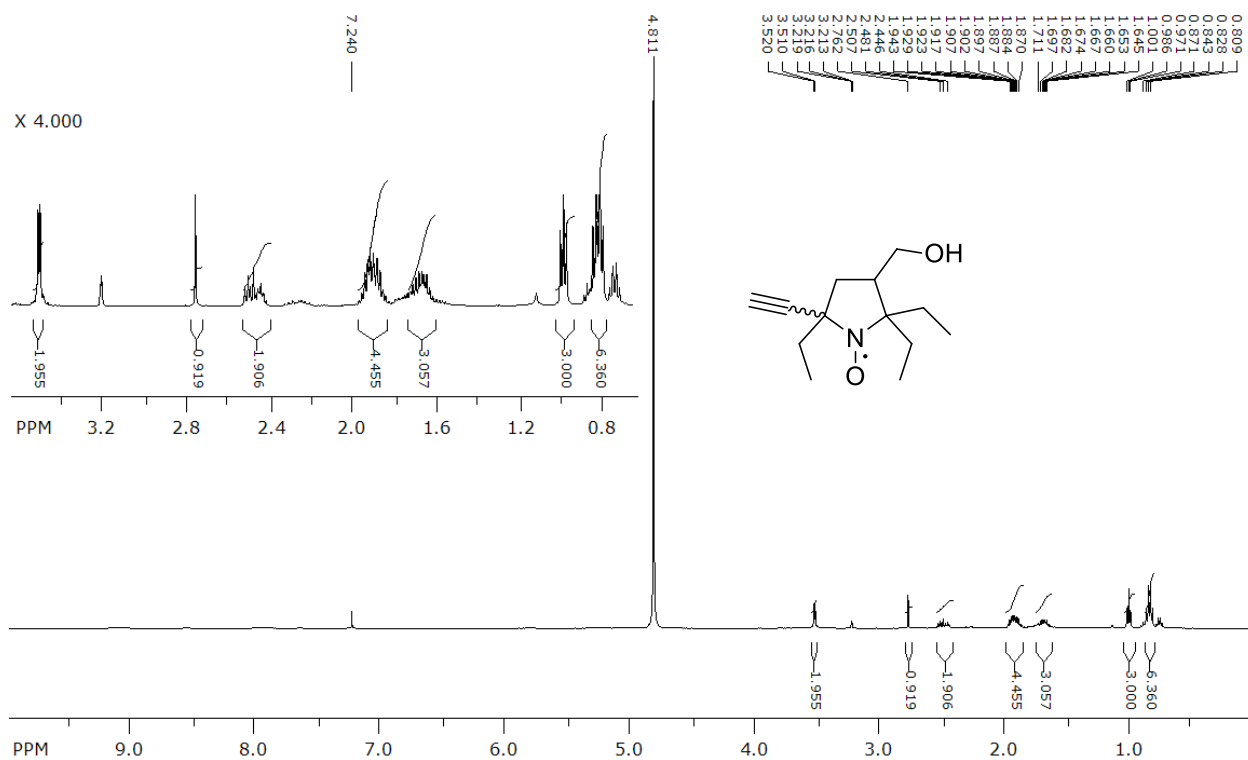

**<sup>1</sup>H NMR (300 MHz; CD<sub>3</sub>OD/CDCl<sub>3</sub>, Zn/CF<sub>3</sub>COOH) of 3-methansulfonyloxy-methyl-2,2,5,5-tetraethylpyrrolidine-1-oxyl (20).**

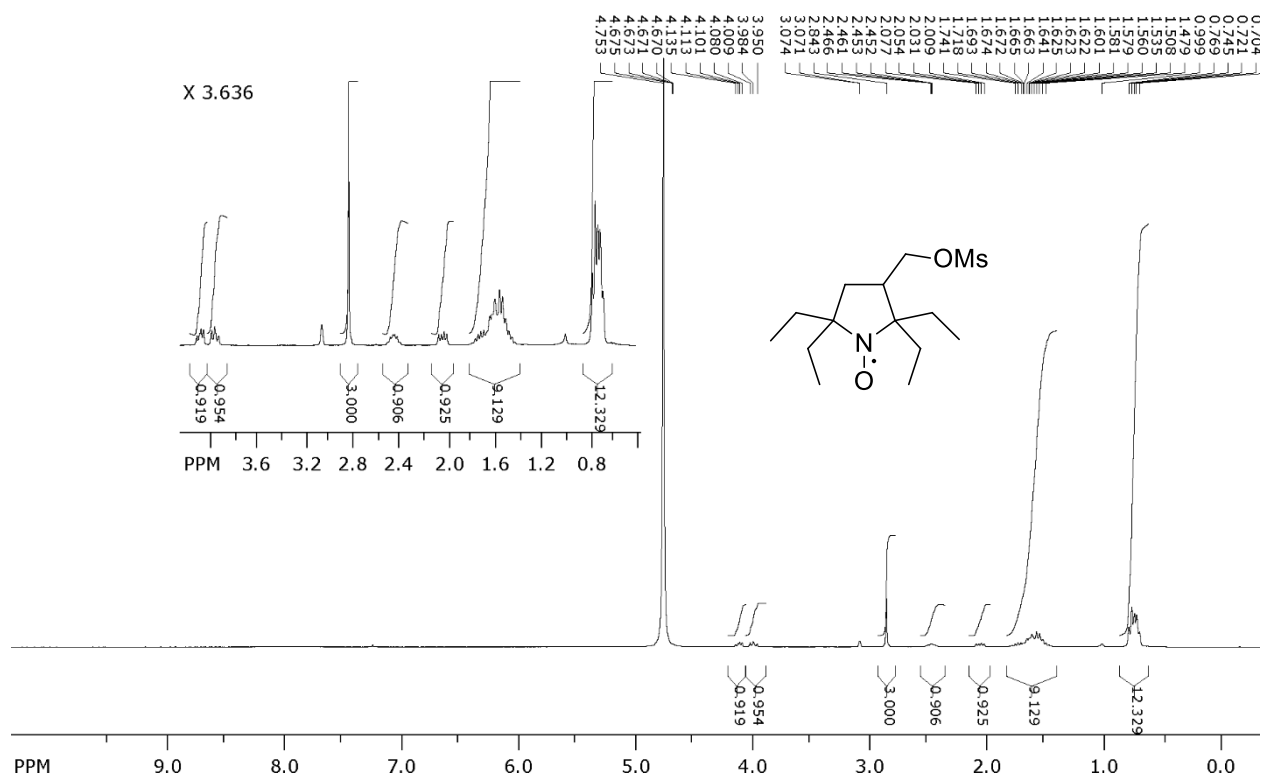

**<sup>1</sup>H NMR (300 MHz; CD<sub>3</sub>OD/CDCl<sub>3</sub>, Zn/CF<sub>3</sub>COOH) of 3-aminomethyl-2,2,5,5-tetraethylpyrrolidine-1-oxyl (22).**

CF<sub>3</sub>COOH

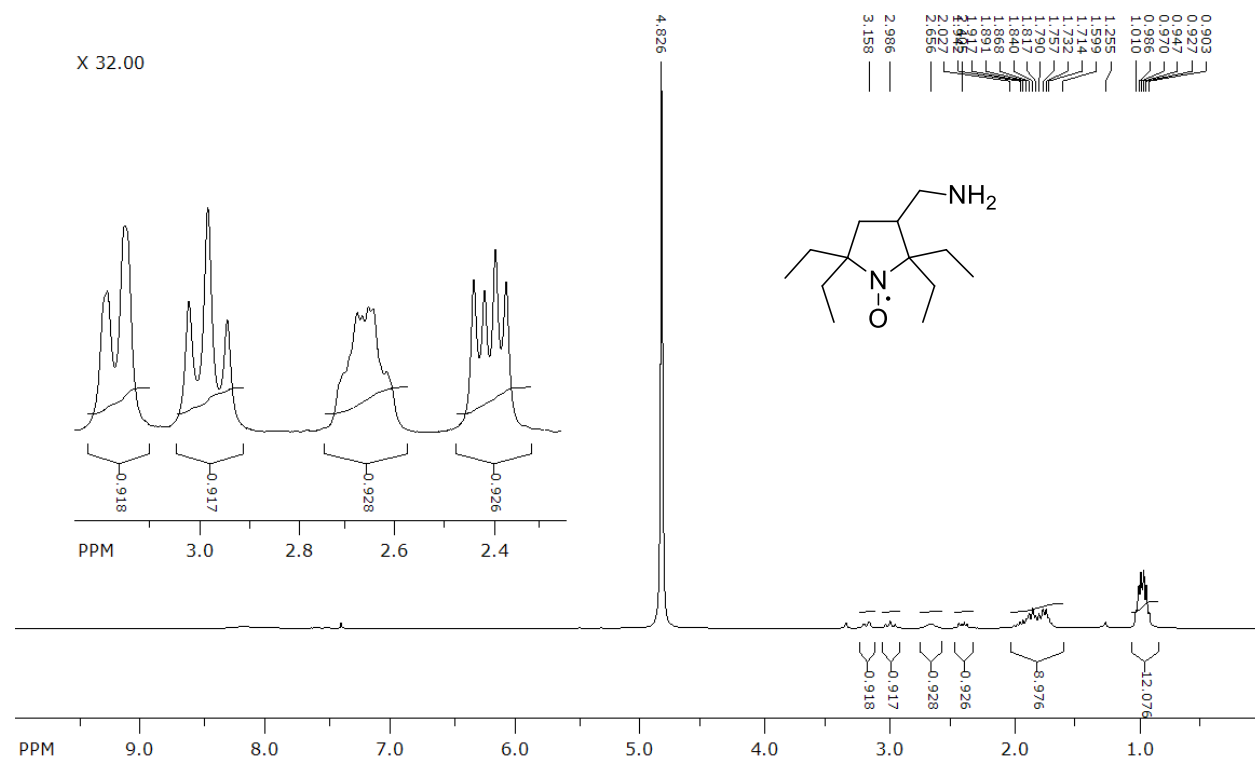

**<sup>1</sup>H NMR (300 MHz; CD<sub>3</sub>OD/CDCl<sub>3</sub>, Zn/CF<sub>3</sub>COOH) of 3-(2-triphenylphosphonioacetamido)methyl-2,2,5,5-tetraethylpyrrolidine-1-oxyl chloride (28).**

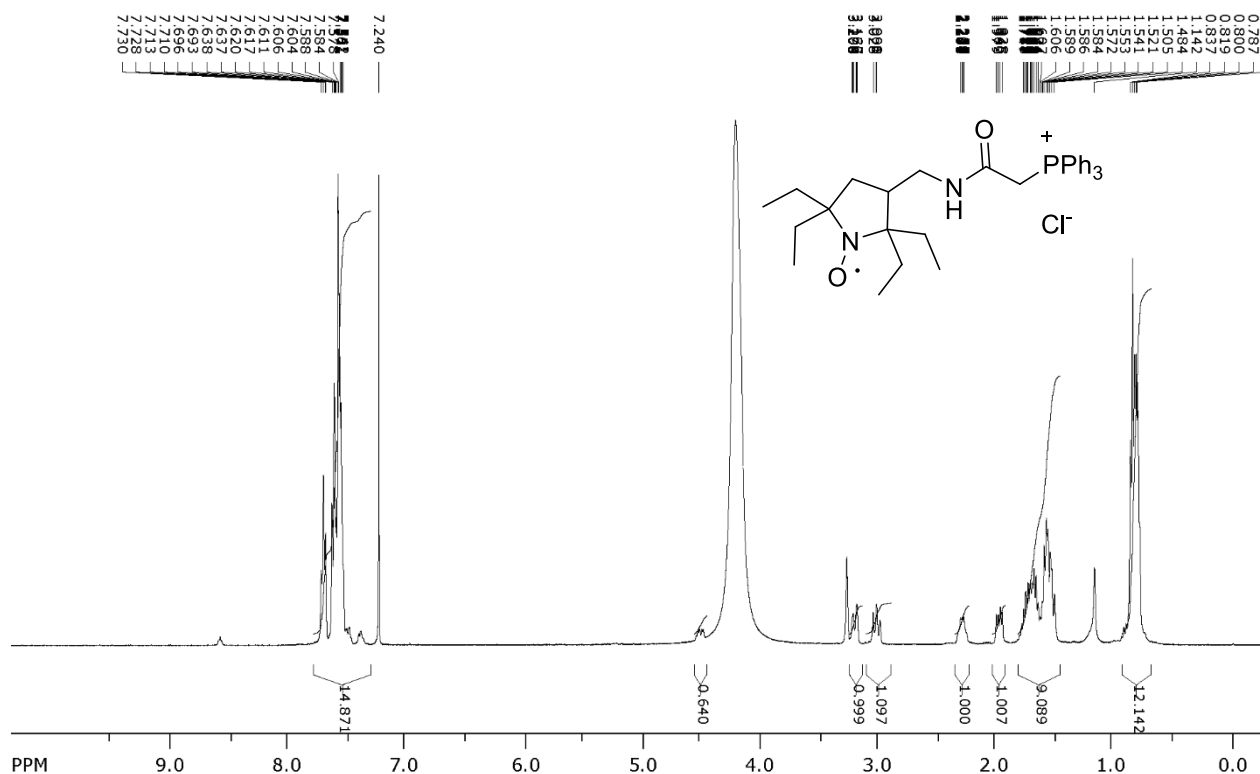

**<sup>1</sup>H NMR (300 MHz; CD<sub>3</sub>OD/CDCl<sub>3</sub>, Zn/CF<sub>3</sub>COOH) of 3-(2-(pyrrolidin-1-yl)acetamidomethyl)-2,2,5,5-tetraethylpyrrolidine-1-oxyl (29).**

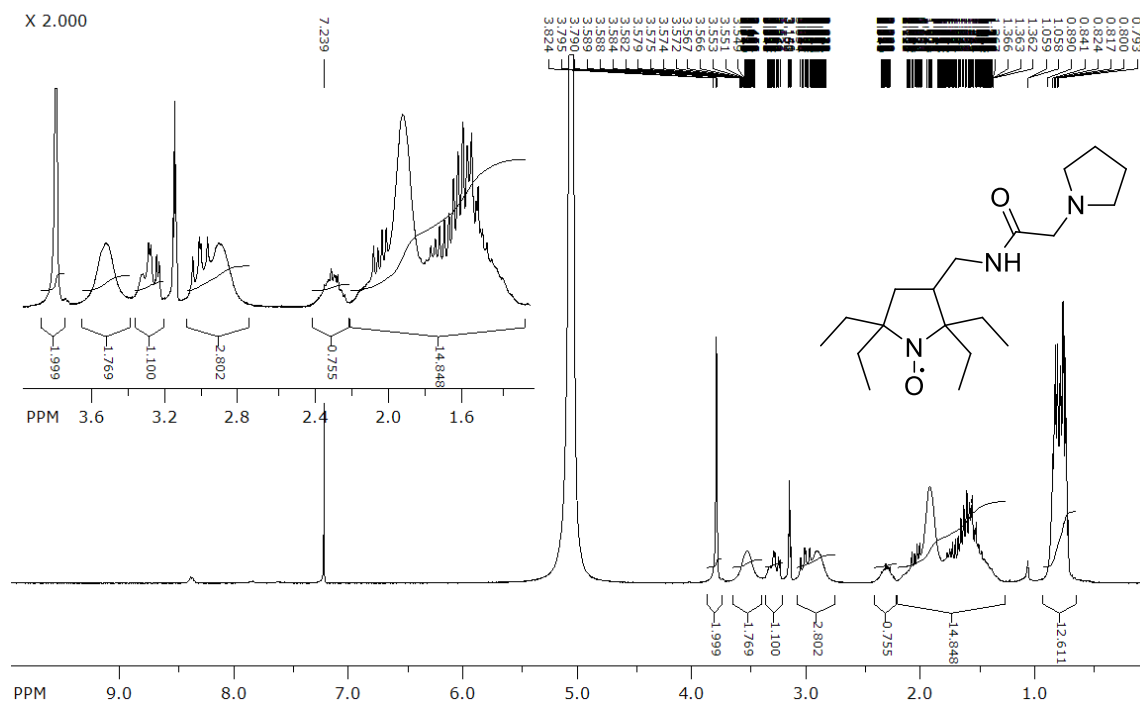

CDCl<sub>3</sub>; CF<sub>3</sub>COO-

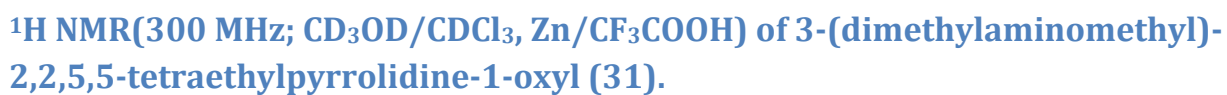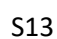

## Line shape analysis of multiplets for mixture of isomers 10a,b.

The analysis was performed using the gNMR 5.0 software is shown in Fig. S1. Parameters of spin system are shown in Table S1 [Budzelaar, P. H. M. "gNMR, version 5.0. 6.0." *Ivorysoft, Nijmegen, Netherlands* (2006).]

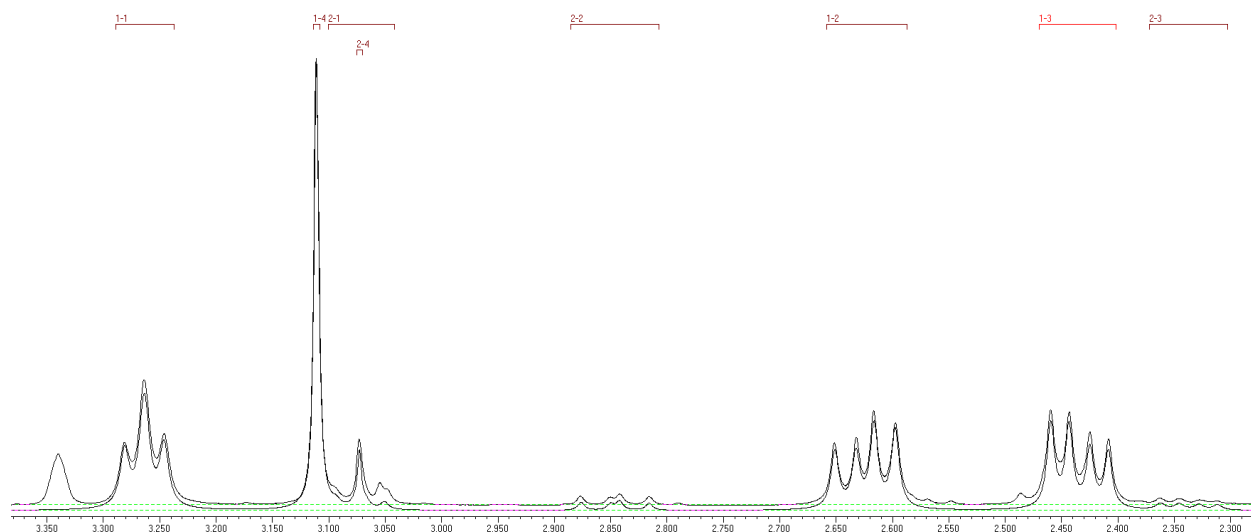

**Fig. S1** Simulation of spin system for  $^1\text{H}$  NMR (400 MHz;  $\text{CD}_3\text{OD}/\text{CDCl}_3$ ,  $\text{Zn}/\text{CF}_3\text{COOH}$  system) of 3-carboxy-5-ethynyl-2,2,5-triethylpyrrolidine-1-oxyl – mixture of isomers (10a,b).

**Table S1.** Simulation of spin system parameters for  $^1\text{H}$  NMR (400 MHz;  $\text{CD}_3\text{OD}/\text{CDCl}_3$ ,  $\text{Zn}/\text{CF}_3\text{COOH}$  system) of 3-carboxy-5-ethynyl-2,2,5-triethylpyrrolidine-1-oxyl – mixture of isomers (10a,b).

| Major isomer – 10a      |              |   |       |       |        |      |      |
|-------------------------|--------------|---|-------|-------|--------|------|------|
| #                       | Nucleus      | n | Shift | J[1]  | J[2]   | J[3] | J[4] |
| 1                       | $^1\text{H}$ | 1 | 3.263 | -     |        |      |      |
| 2                       | $^1\text{H}$ | 1 | 2.623 | 7.55  |        |      |      |
| 3                       | $^1\text{H}$ | 1 | 2.436 | 6.49  | -13.94 |      |      |
| 4                       | $^1\text{H}$ | 1 | 3.111 | -     | -      | -    |      |
| Concentration: 86.87975 |              |   |       |       |        |      |      |
| Minor isomer -10b       |              |   |       |       |        |      |      |
| #                       | Nucleus      | n | Shift | J[1]  | J[2]   | J[3] | J[4] |
| 1                       | $^1\text{H}$ | 1 | 3.071 |       |        |      |      |
| 2                       | $^1\text{H}$ | 1 | 2.846 | 10.51 |        |      |      |
| 3                       | $^1\text{H}$ | 1 | 2.337 | 6.65  | -13.72 |      |      |
| 4                       | $^1\text{H}$ | 1 | 3.073 | -     | -      | -    | -    |
| Concentration: 8.25143  |              |   |       |       |        |      |      |

## IR spectra

### IR (KBr) of 3-carboxy-2,2,5,5-tetraethylpyrrolidine-1-oxyl (1).

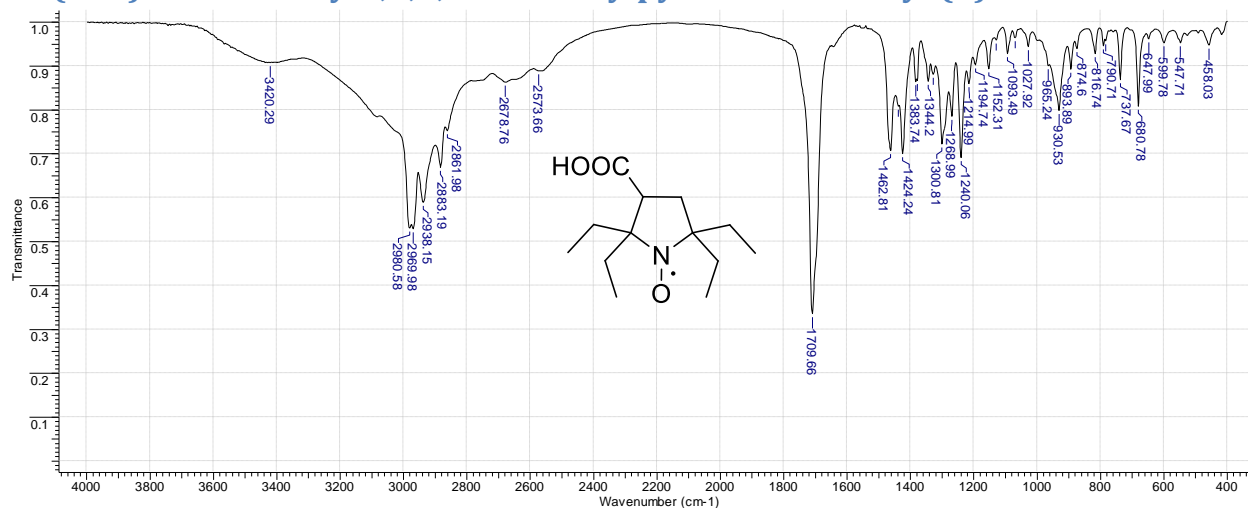

### IR (neat) of 3-[[[(2,5-dioxo-1-pyrrolidinyl)oxy]carbonyl]-2,2,5,5-tetraethylpyrrolidine-1-oxyl (3).

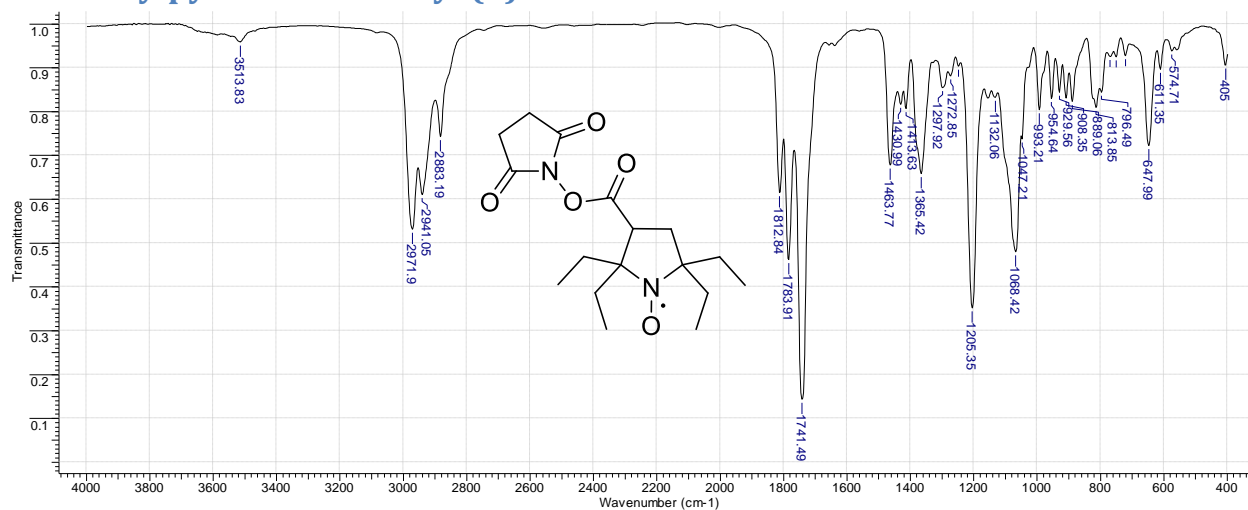

### IR (KBr) of 3-carboxy-2,2,5-triethyl-3,4-dihydro-2H-pyrrole 1-oxide (8).

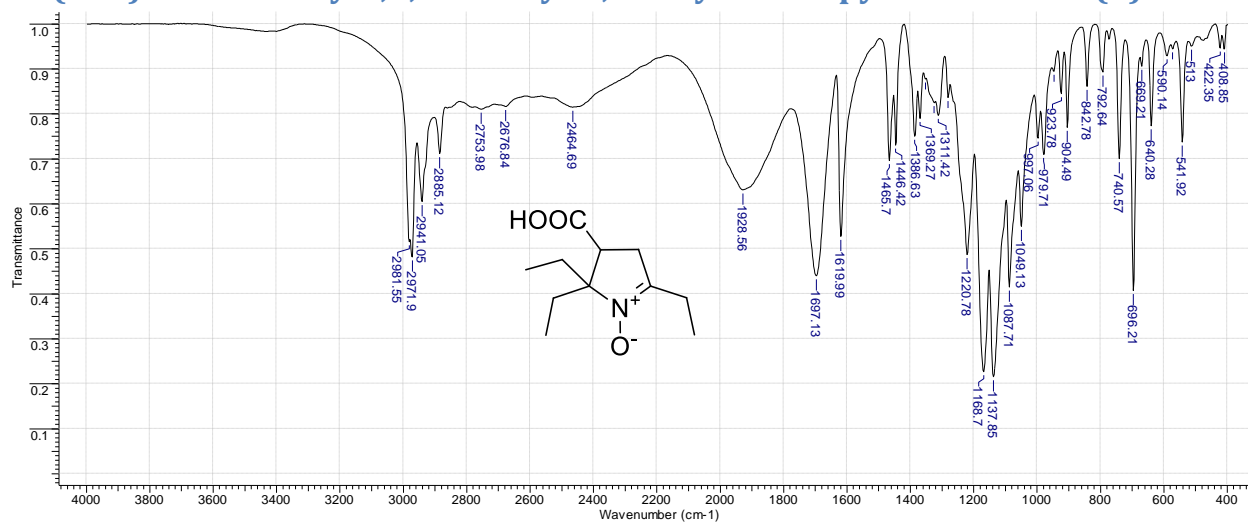

### IR (KBr) of 3-carboxy-5-ethynyl-2,2,5-triethylpyrrolidine-1-oxyl (10a,b).

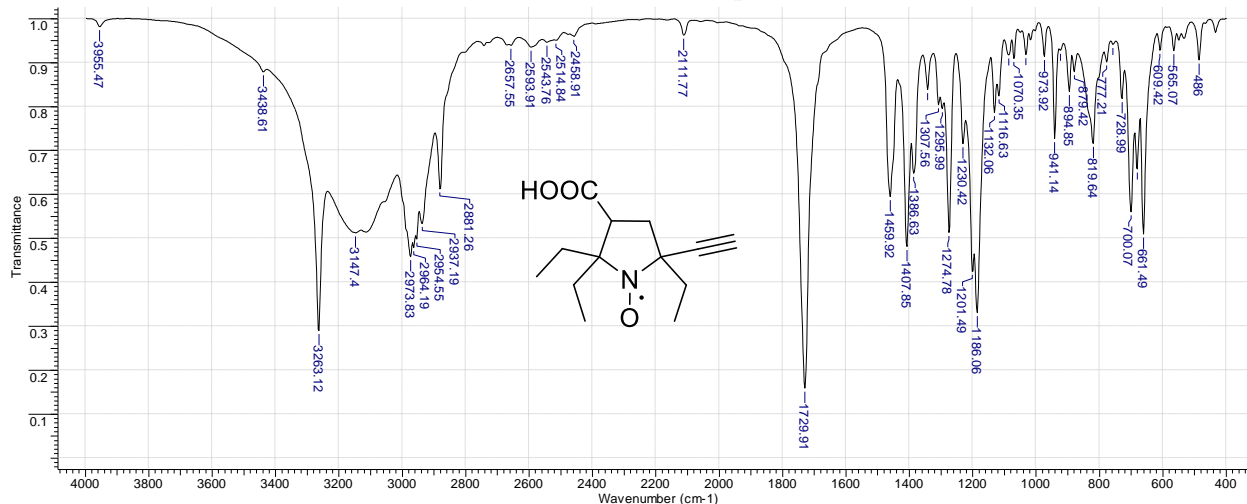

### IR (KBr) of 3-carboxy-5-vinyl-2,2,5-triethylpyrrolidine-1-oxyl (14).

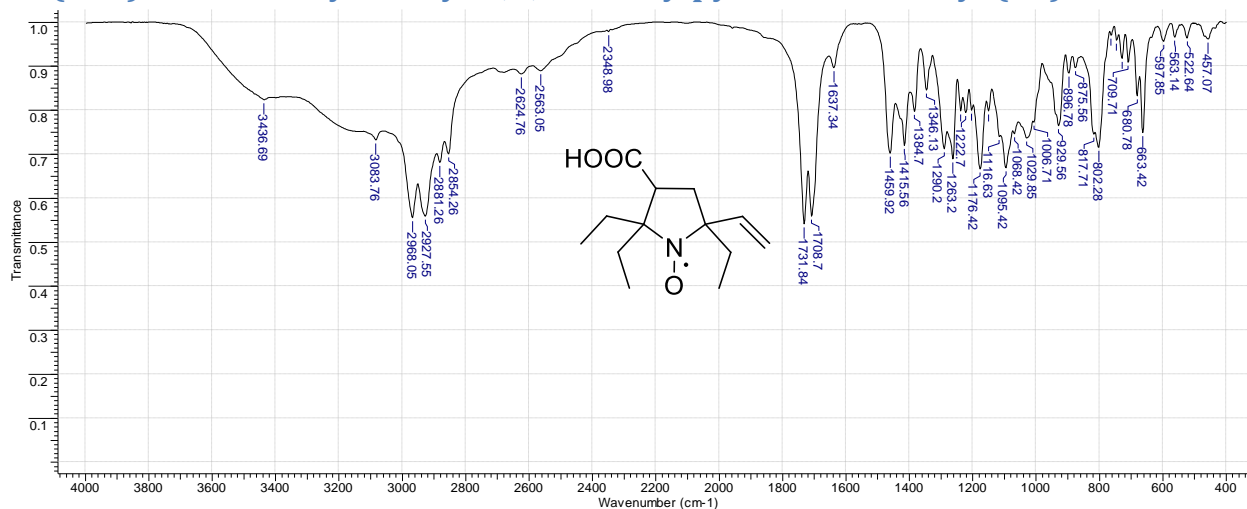

### IR (KBr) of 3-carboxy-2,2,5,5-tetraethylpyrrolidine (15).

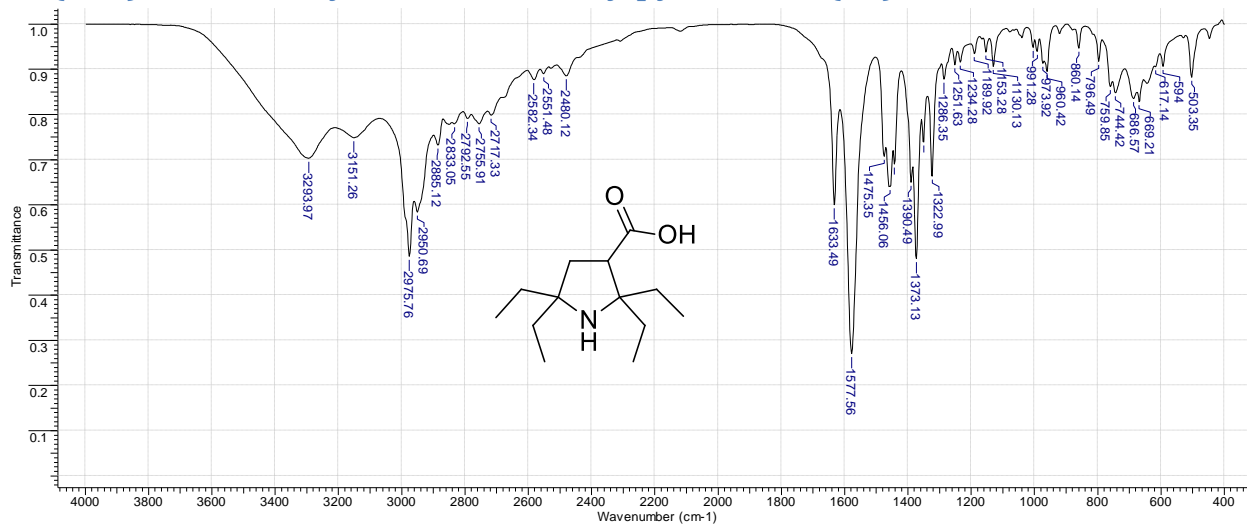

### IR (neat) of 3-methoxycarbonyl-2,2,5,5-tetraethylpyrrolidine-1-oxyl (16).

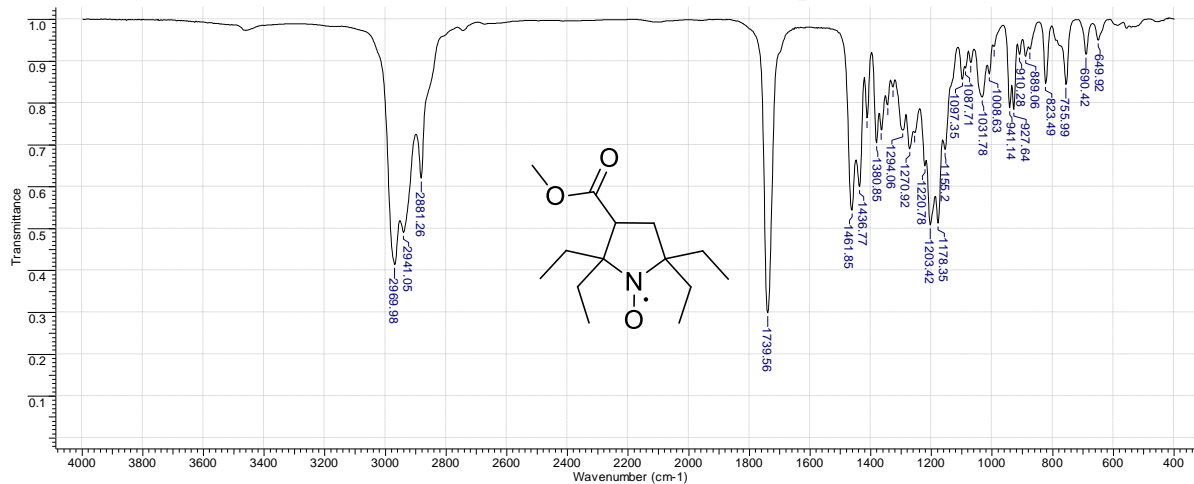

### IR (KBr) of 1-hydroxy-3-methoxycarbonyl-2,2,5,5-tetraethylpyrrolidine hydrochloride (17)

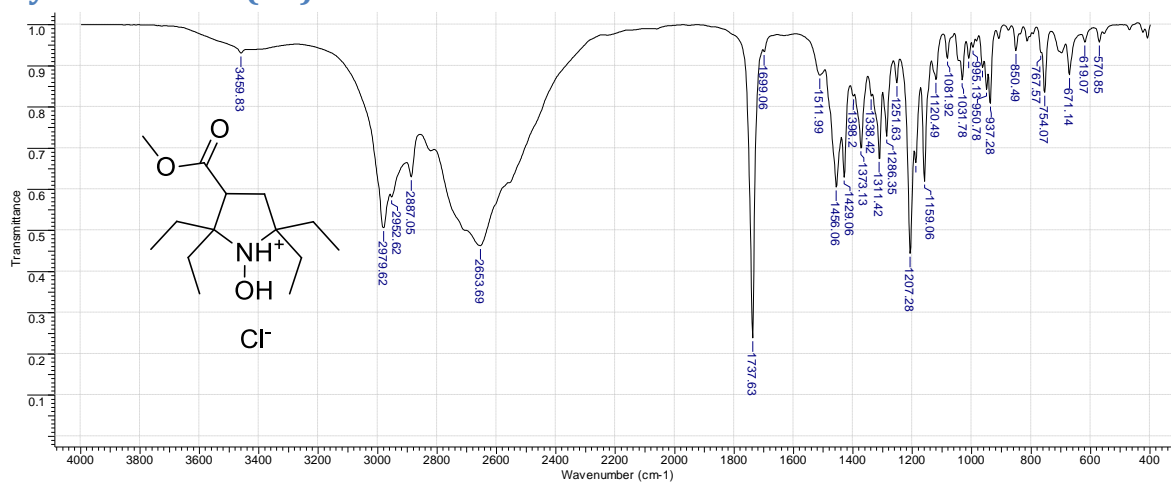

### IR (neat) of 3-hydroxymethyl-2,2,5,5-tetraethylpyrrolidine-1-oxyl (18).

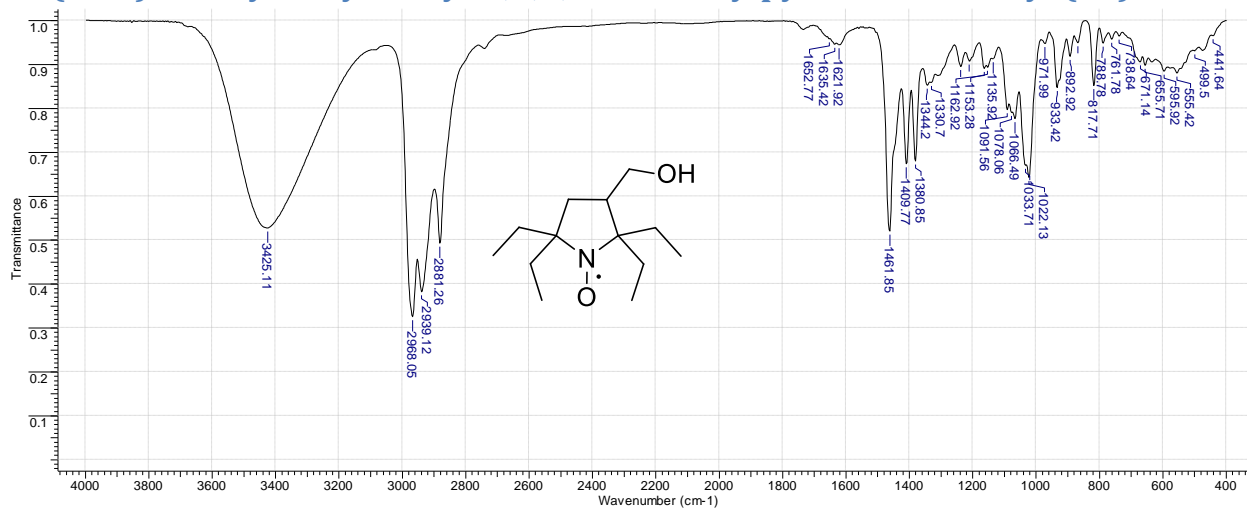

**IR (neat) of 3-hydroxymethyl-5-ethynyl-2,2,5-triethylpyrrolidine-1-oxyl (19a,b).**

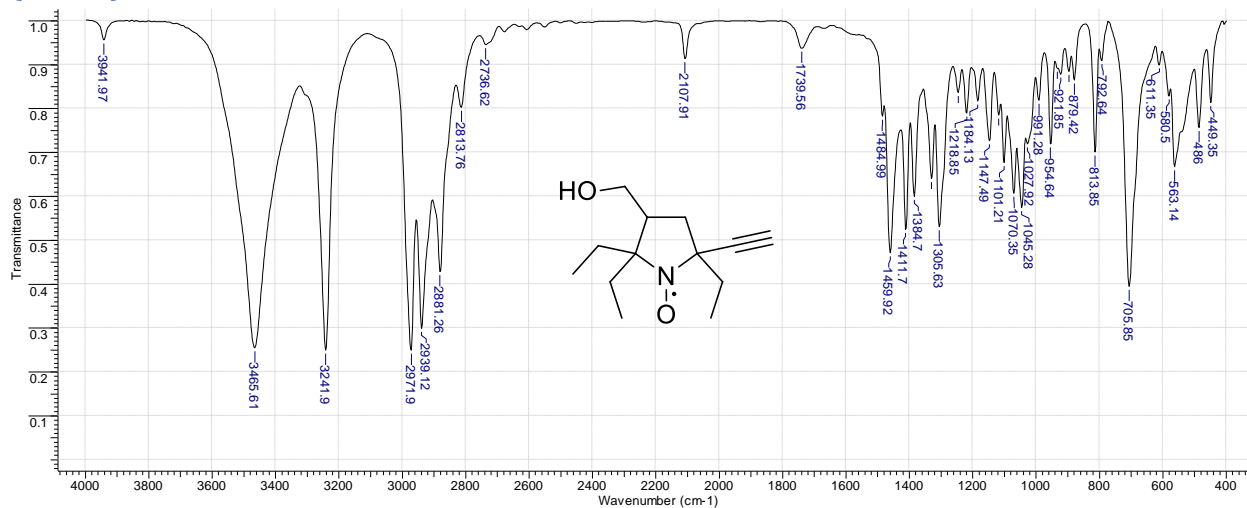

**IR (neat) of 3-bromomethyl-2,2,5,5-tetraethylpyrrolidine-1-oxyl (20a).**

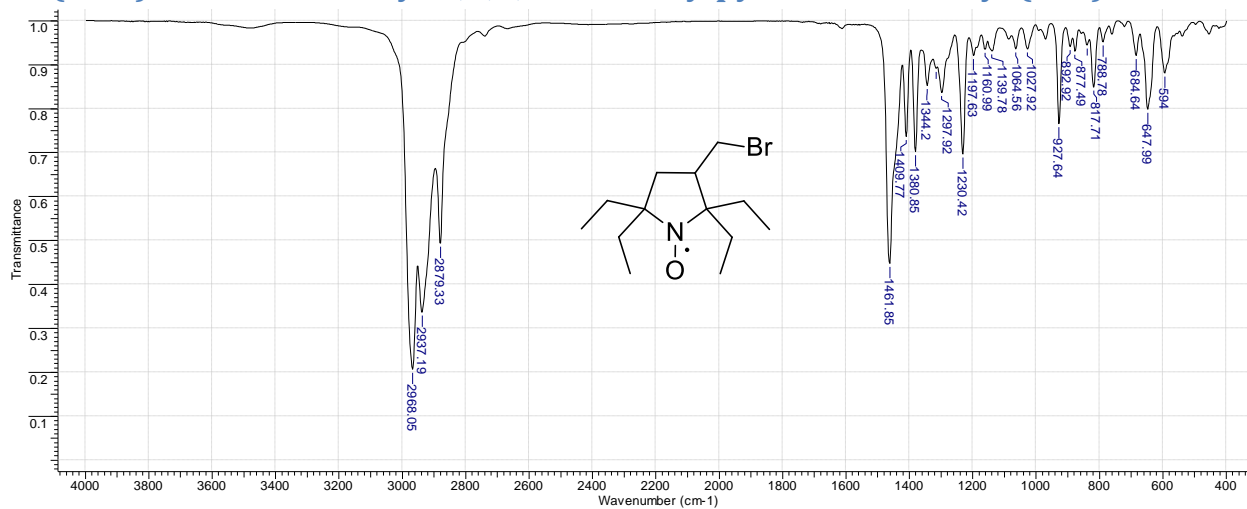

**IR (neat) of 3-mesyloxymethyl-2,2,5,5-tetraethylpyrrolidine-1-oxyl (20b).**

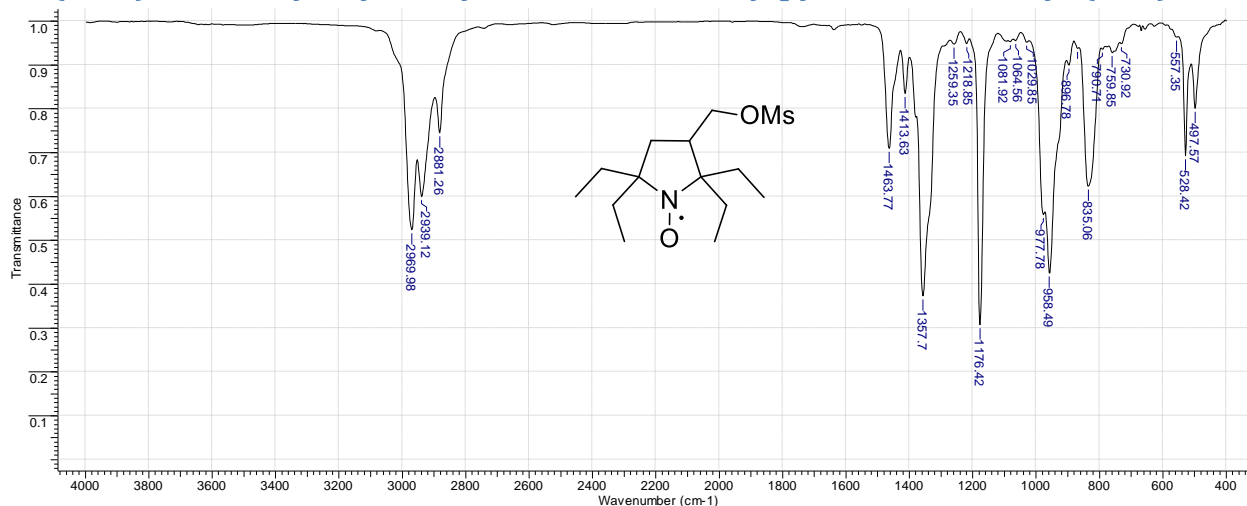

### IR (neat) of 3-azidomethyl-2,2,5,5-tetraethylpyrrolidine-1-oxyl (21).

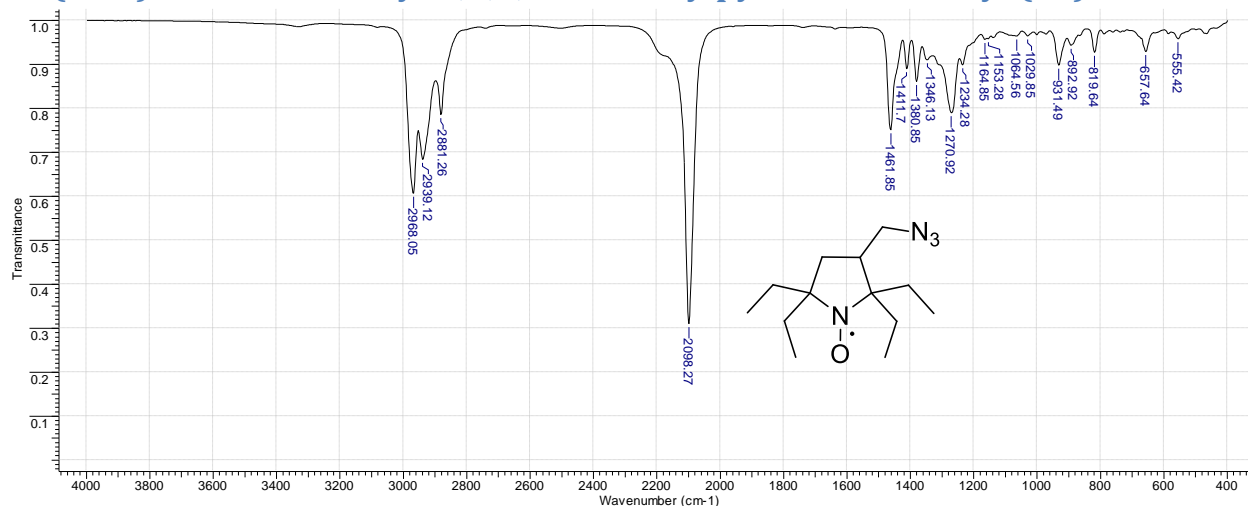

### IR (neat) of 3-aminomethyl-2,2,5,5-tetraethylpyrrolidine-1-oxyl (22).

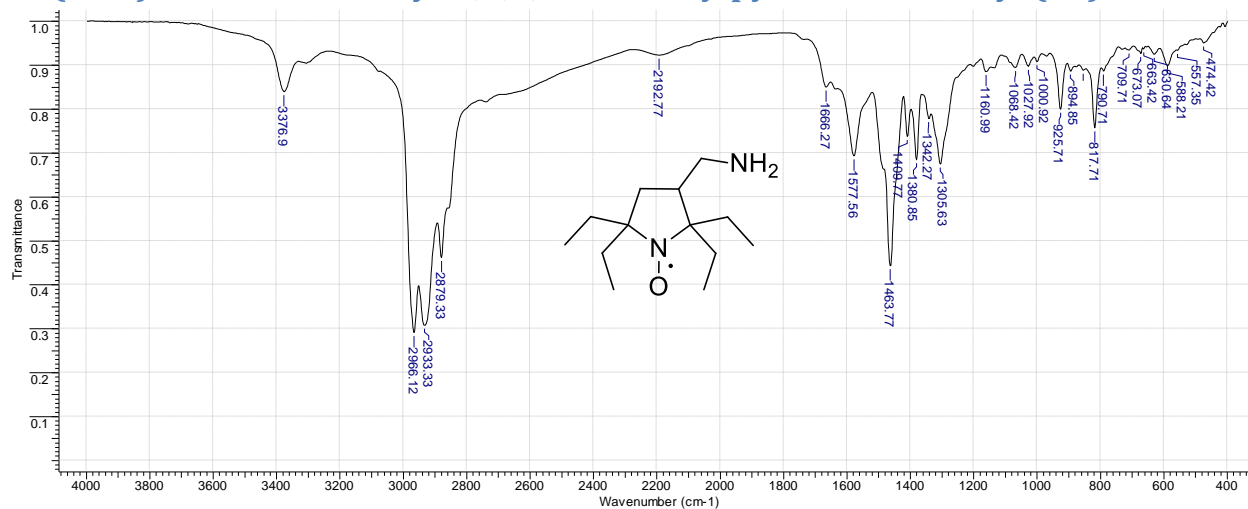

### IR (KBr) of 3-maleimidomethyl-2,2,5,5-tetraethylpyrrolidine-1-oxyl (24).

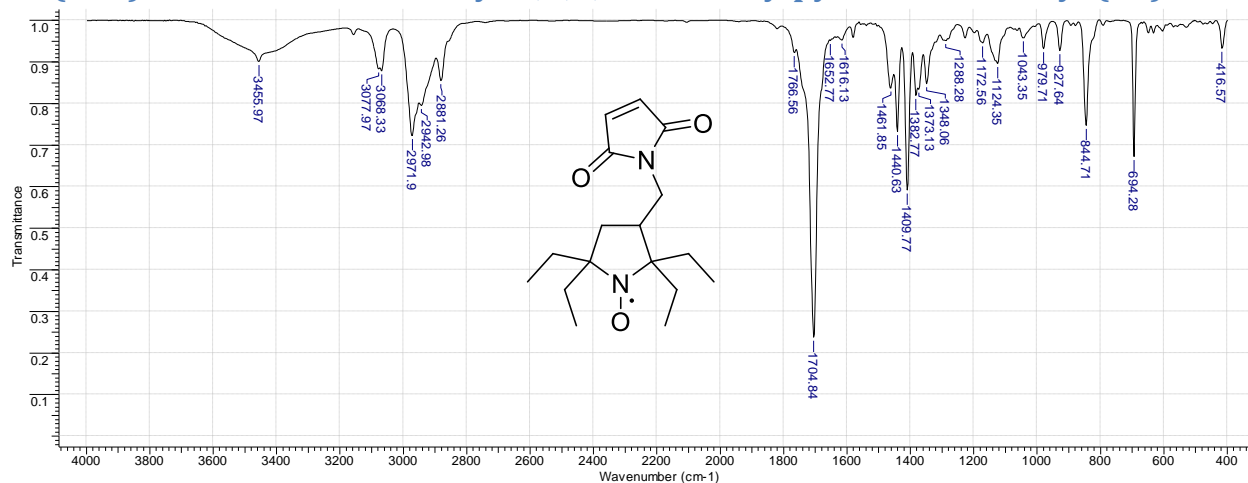

**IR (neat) of 3-bromoacetamidomethyl-2,2,5,5-tetraethylpyrrolidine-1-oxyl (25).**

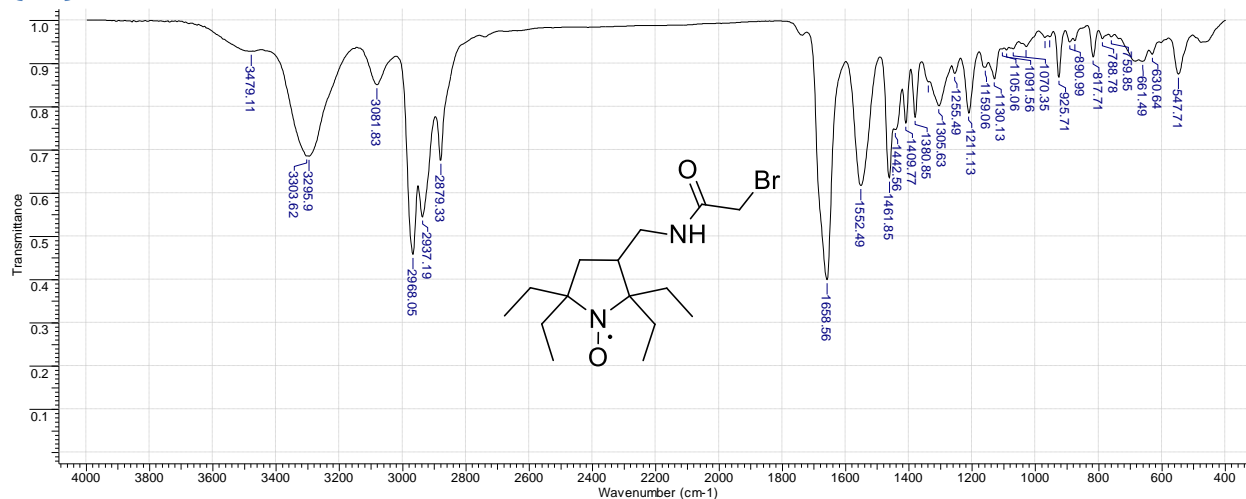

**IR (neat) of 3-Chloroacetamidomethyl-2,2,5,5-tetraethylpyrrolidine-1-oxyl (26).**

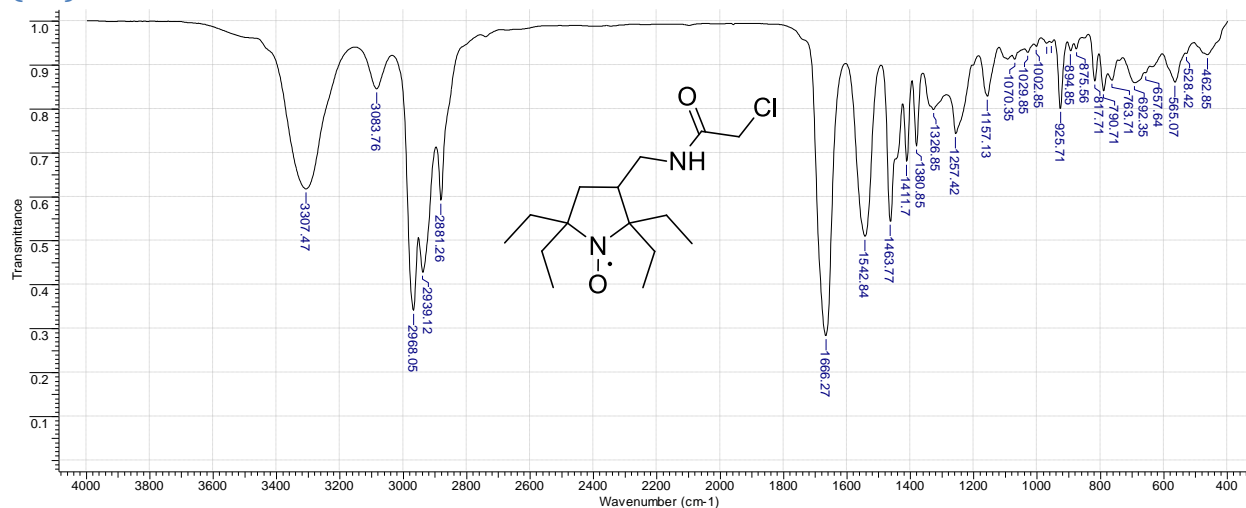

**IR (KBr) of 3-Iodoacetamidomethyl-2,2,5,5-tetraethylpyrrolidine-1-oxyl (27).**

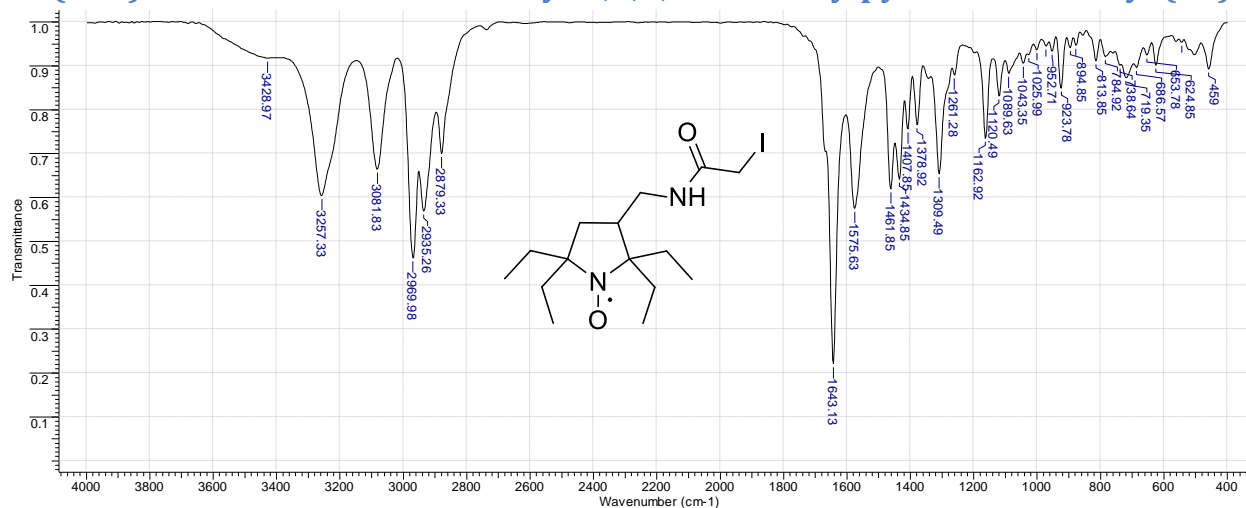

**IR (KBr) of 3-(2-(triphenylphosphonio-acetamido)methyl)-2,2,5,5-tetraethylpyrrolidine-1-oxyl chloride (28).**

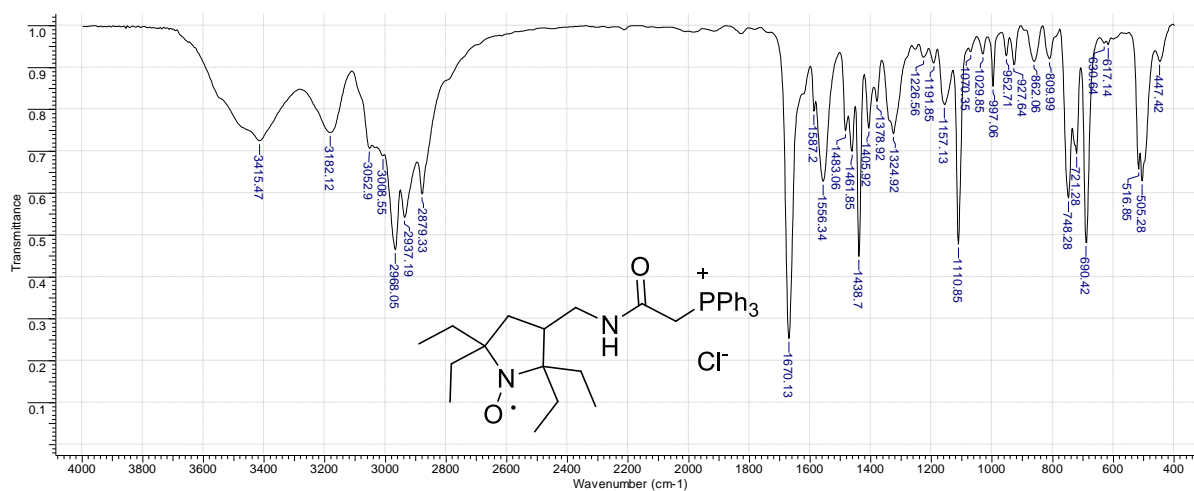

**IR (neat) of 3-(2-(pyrrolidin-1-yl)acetamidomethyl)-2,2,5,5-tetraethylpyrrolidine-1-oxyl (29).**

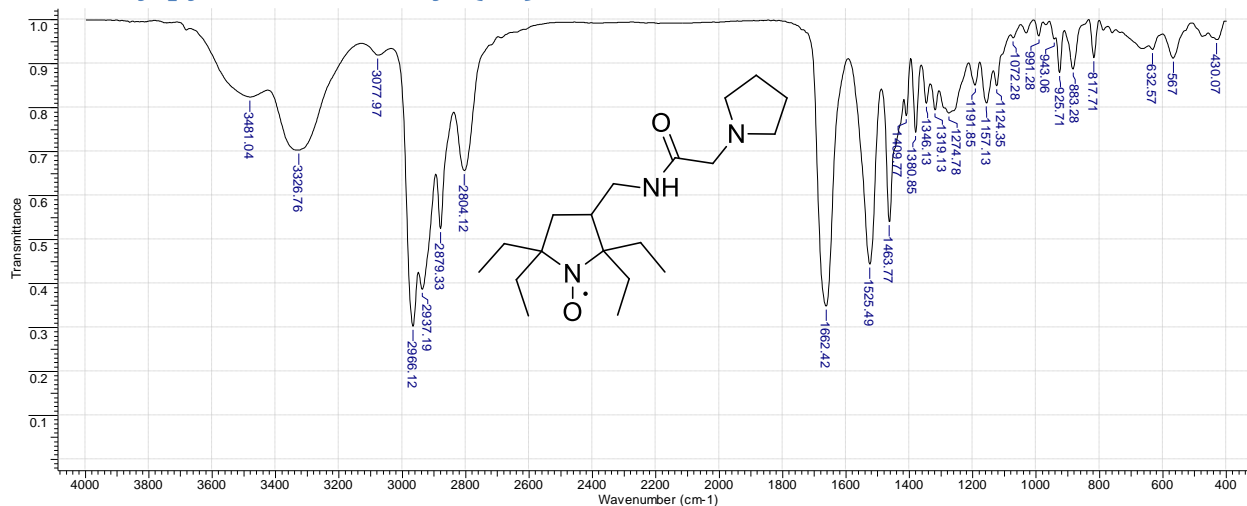

**IR (neat) of 3-((piperidin-1-yl)methyl)-2,2,5,5-tetraethylpyrrolidine-1-oxyl (30).**

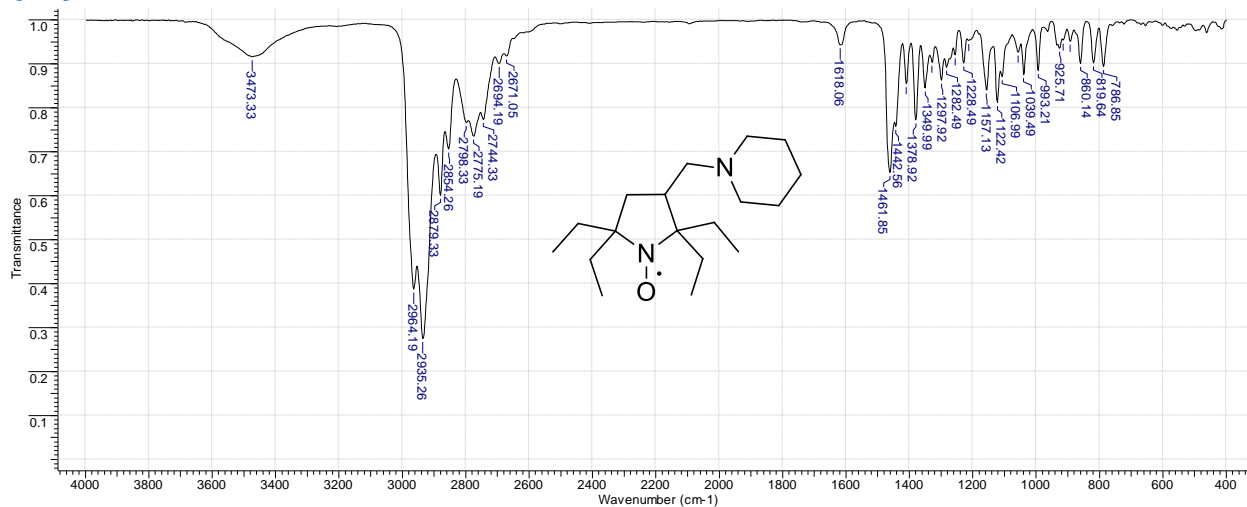

IR (neat) of 3-(dimethylaminomethyl)-2,2,5,5-tetraethylpyrrolidine-1-oxyl  
(31).

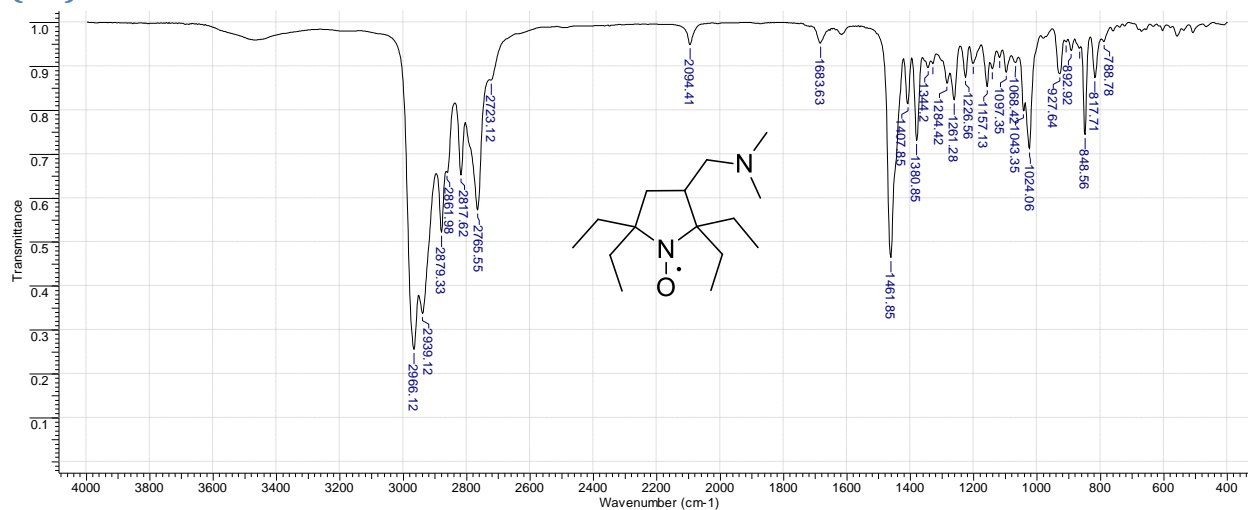

## HPLC analyses

### HPLC of 3-carboxy-5-ethynyl-2,2,5-triethylpyrrolidine-1-oxyl major isomer(19a).

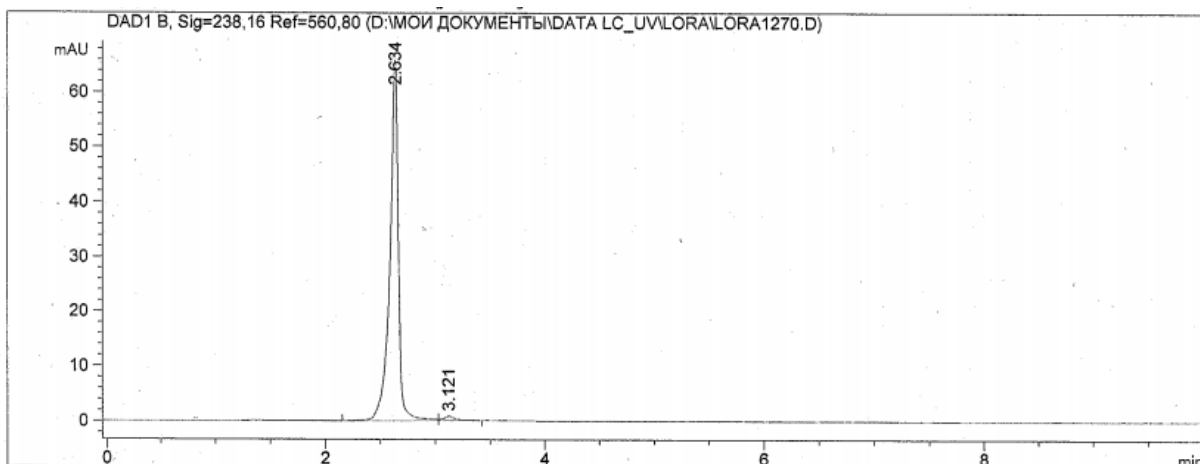

#### Area Percent Report

Sorted By : Signal  
Multiplier: : 1.0000  
Dilution: : 1.0000  
Use Multiplier & Dilution Factor with ISTDs

Signal 1: DAD1 B, Sig=238,16 Ref=560,80

| Peak # | RetTime [min] | Type | Width [min] | Area [mAU*s] | Height [mAU] | Area %  |
|--------|---------------|------|-------------|--------------|--------------|---------|
| 1      | 2.634         | BV   | 0.0767      | 354.74719    | 66.02786     | 98.3314 |
| 2      | 3.121         | VB   | 0.1055      | 6.01980      | 8.02957e-1   | 1.6686  |

Totals : 360.76699 66.83082

# HPLC of 3-((piperidin-1-yl)methyl)-2,2,5,5-tetraethylpyrrolidine-1-oxyl (30).

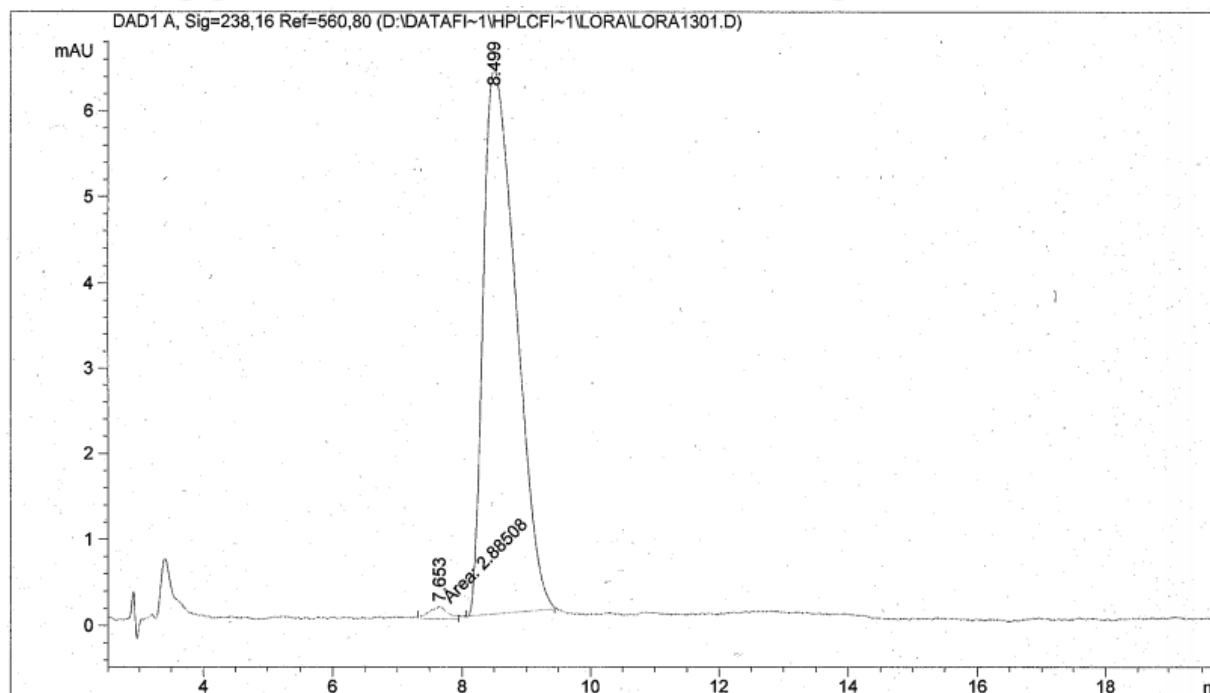

## Area Percent Report

Sorted By : Signal  
Multiplier : 1.0000  
Dilution : 1.0000  
Use Multiplier & Dilution Factor with ISTDs

Signal 1: DAD1 A, Sig=238,16 Ref=560,80

| Peak # | RetTime [min] | Type | Width [min] | Area [mAU*s] | Height [mAU] | Area %  |
|--------|---------------|------|-------------|--------------|--------------|---------|
| 1      | 7.653         | MM   | 0.3434      | 2.88508      | 1.40031e-1   | 1.2723  |
| 2      | 8.499         | BB   | 0.5095      | 223.88176    | 6.34769      | 98.7277 |

Totals : 226.76684 6.48772

# HPLC of 3-(2-(pyrrolidin-1yl)acetamidomethyl)-2,2,5,5-tetraethylpyrrolidine-1-oxyl (29).

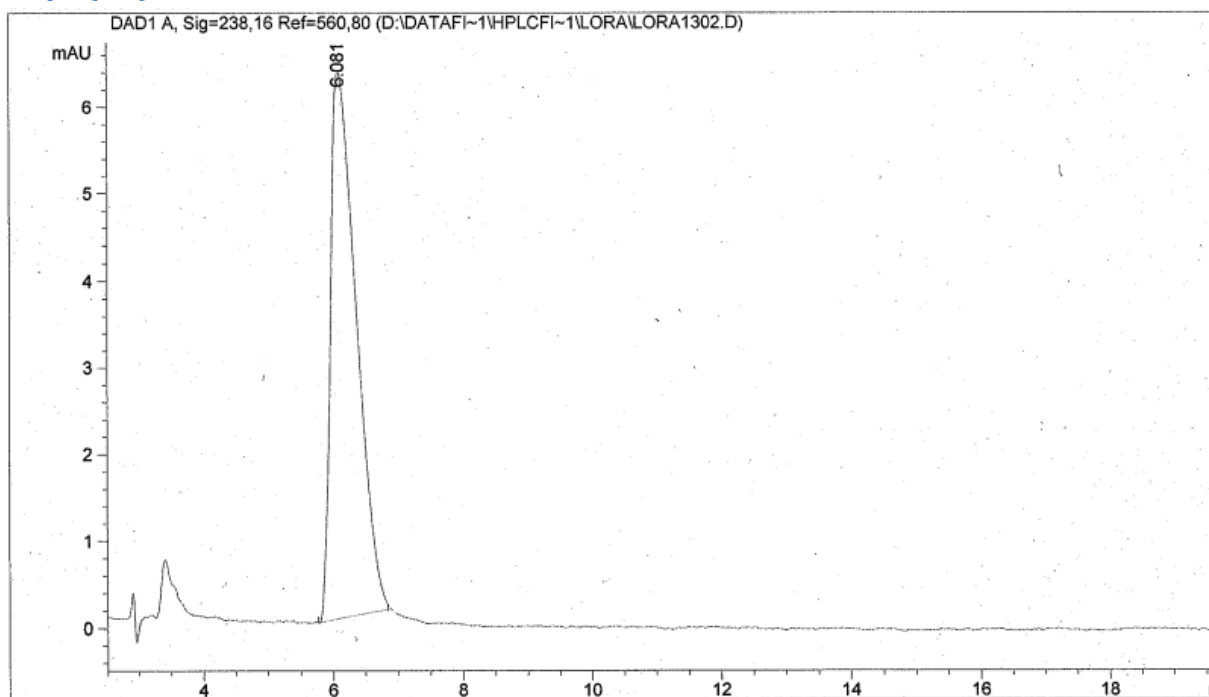

## Area Percent Report

Sorted By : Signal  
Multiplier : 1.0000  
Dilution : 1.0000  
Use Multiplier & Dilution Factor with ISTDs

Signal 1: DAD1 A, Sig=238,16 Ref=560,80

| Peak #   | RetTime [min] | Type | Width [min] | Area [mAU*s] | Height [mAU] | Area %   |
|----------|---------------|------|-------------|--------------|--------------|----------|
| 1        | 6.081         | PB   | 0.3941      | 172.00441    | 6.30903      | 100.0000 |
| Totals : |               |      |             | 172.00441    | 6.30903      |          |

**Table S2. X-ray experimental details**

|                                                                            |                                                                        |
|----------------------------------------------------------------------------|------------------------------------------------------------------------|
| <b>Crystal data</b>                                                        | Compound <b>10a</b> (dsa112k)                                          |
| Chemical formula                                                           | C <sub>13</sub> H <sub>20</sub> NO <sub>3</sub>                        |
| $M_r$                                                                      | 238.30                                                                 |
| Crystal system, space group                                                | Orthorhombic, $Pna2_1$                                                 |
| Temperature (K)                                                            | 296                                                                    |
| $a, b, c$ (Å)                                                              | 19.2686 (9), 8.1112 (3), 8.6742 (3)                                    |
| $V$ (Å <sup>3</sup> )                                                      | 1355.70 (9)                                                            |
| $Z$                                                                        | 4                                                                      |
| Radiation type                                                             | Mo $K\alpha$                                                           |
| $\mu$ (mm <sup>-1</sup> )                                                  | 0.08                                                                   |
| Crystal size (mm)                                                          | 0.61 × 0.32 × 0.12                                                     |
| <b>Data collection</b>                                                     |                                                                        |
| Diffractometer                                                             | Bruker <i>APEX-II</i> CCD                                              |
| Absorption correction                                                      | Multi-scan<br><i>SADABS2008/1</i>                                      |
| $T_{\min}, T_{\max}$                                                       | 0.911, 0.956                                                           |
| No. of measured, independent and observed [ $I > 2\sigma(I)$ ] reflections | 16081, 3131, 2834                                                      |
| $R_{\text{int}}$                                                           | 0.044                                                                  |
| $(\sin \theta/\lambda)_{\max}$ (Å <sup>-1</sup> )                          | 0.659                                                                  |
| <b>Refinement</b>                                                          |                                                                        |
| $R[F^2 > 2\sigma(F^2)], wR(F^2), S$                                        | 0.040, 0.113, 1.03                                                     |
| No. of reflections                                                         | 3131                                                                   |
| No. of parameters                                                          | 160                                                                    |
| No. of restraints                                                          | 2                                                                      |
| H-atom treatment                                                           | H atoms treated by a mixture of independent and constrained refinement |
| $\sigma_{\max}, \sigma_{\min}$ (e Å <sup>-3</sup> )                        | 0.34, -0.17                                                            |
| Absolute structure parameter                                               | 0.2 (3)                                                                |
| CCDC number                                                                | 2111214                                                                |

**Fig.S2. X-Ray of 3-carboxy-5-ethynyl-2,2,5-triethylpyrrolidine-1-oxyl (10a).**

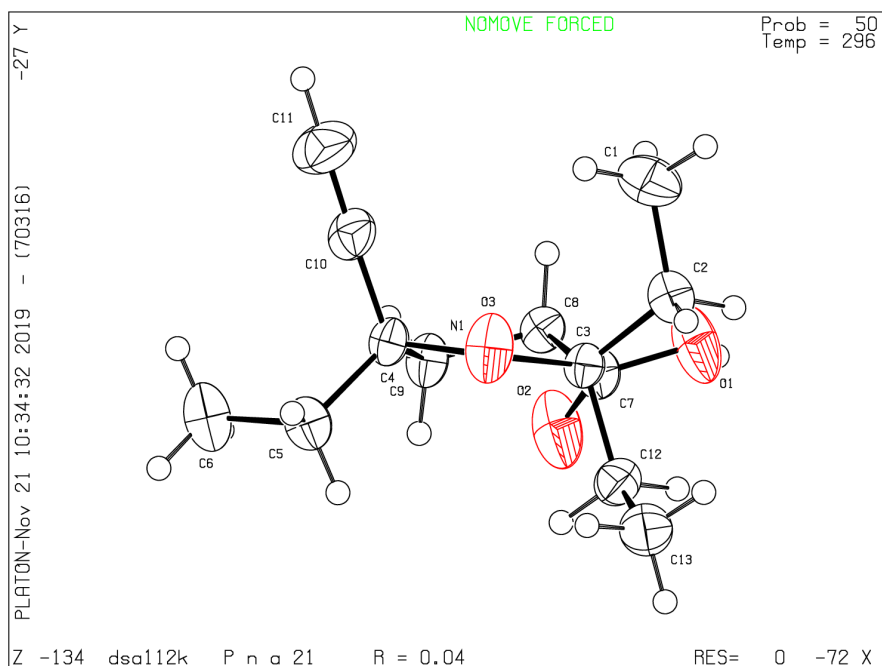

Computer programs: Bruker *APEX2*, Bruker *SAINT*, *SHELXS2018* (Sheldrick, 2018), *SHELXL2018/3* (Sheldrick, 2018), Bruker *SHELXTL*.

**Fig. S3. The dependences of the first order rates of radical reductions versus ascorbic acid concentrations.**

Data were fitted by linear dependences starting at zero. Second order reaction rate constant is a slope of such dependence.

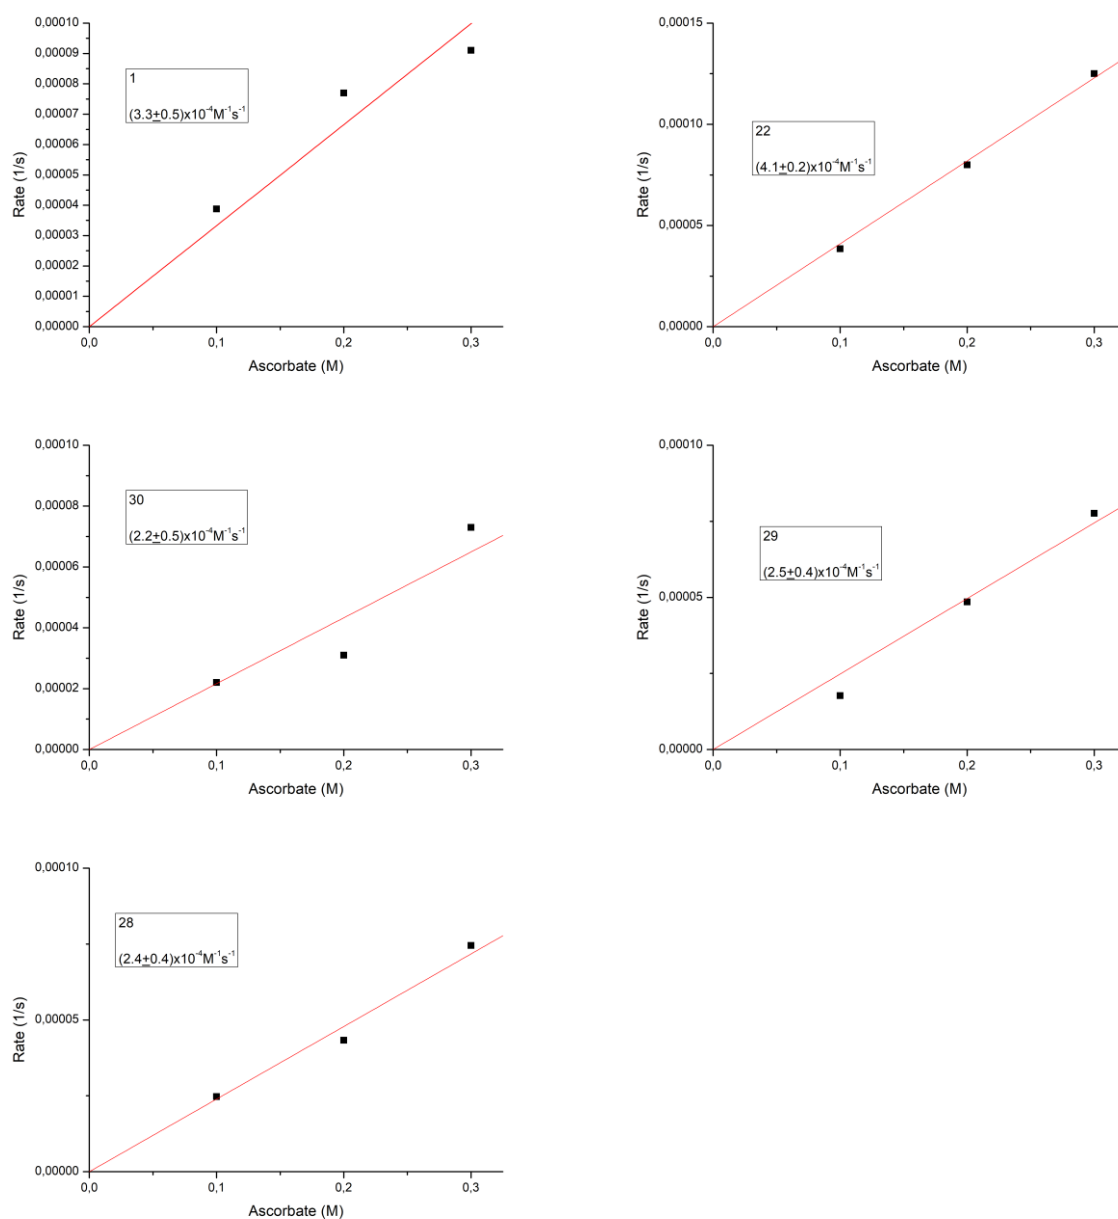

Supplement: s1 [file s1]
